# Supplementary material for: Geographical distribution of Amblyomma cajennense (sensu lato) ticks (Parasitiformes: Ixodidae) in Brazil, with description of the nymph of A. cajennense (sensu stricto)
Source: PubMed Central journal article supplement (PMC4818509; doi:10.1186/s13071-016-1460-2), 2016-03-31
Supplement: 13071_2016_1460_MOESM1_ESM.pdf [file 13071_2016_1460_MOESM1_ESM.pdf]

**Supplemental Table 1: Records of *Amblyomma cajennense sensu stricto* (s.s. ), *Amblyomma sculptum*, and *Amblyomma cajennense sensu lato* (s.l.) that were examined in the tick collections “Acari Colletion of the Instituto Butantan” (IBSP), São Paulo, Brazil, and “Coleção Nacional de Carrapatos” (CNC) of the University of São Paulo, São Paulo, Brazil.**

| Tick species                 | No. Males<br>** | No. Females | host                   | municipality       | state              | latitude longitude | date           | Acession number |
|------------------------------|-----------------|-------------|------------------------|--------------------|--------------------|--------------------|----------------|-----------------|
| <b>IBSP</b>                  |                 |             |                        |                    |                    |                    |                |                 |
| <i>A. cajennense s. s.</i>   |                 | 1           | <i>T. terrestris</i>   | Altamira           | Pará               | 3°12'S 52°12'W     | March 1939     | IBSP 1661       |
| <i>A. cajennense s. s.</i>   | 4               | 3           | <i>T. terrestris</i>   | Altamira           | Pará               | 3°12'S 52°12'W     | March 1939     | IBSP 1665       |
| <i>A. cajennense s. s.</i>   | 5               | 3           | <i>T. terrestris</i>   | Nova Xavantina     | Mato Grosso        | 14°40'S 52°21'W    | February 1952  | IBSP 3867       |
| <i>A. cajennense s. s.</i>   | 1               | 2           | <i>E. caballus</i>     | Monte Alegre       | Pará               | 2°0'S 54°4'W       | August 1957    | IBSP 5196       |
| <i>A. cajennense s. s.</i>   | 29              | 16          | <i>H. sapiens</i>      | Monte Alegre       | Pará               | 2°0'S 54°4'W       | August 1957    | IBSP 5179       |
| <i>A. cajennense s. s.</i>   | 4               | 8           | <i>H. sapiens</i>      | Monte Alegre       | Pará               | 2°0'S 54°4'W       | August 1957    | IBSP 5193       |
| <i>A. cajennense s. s.</i>   | 1               | 3           | <i>T. terrestris</i>   | Monte Alegre       | Pará               | 2°0'S 54°4'W       | August 1957    | IBSP 5186       |
| <i>A. cajennense s. s.</i>   | 2               | 3           | <i>T. terrestris</i>   | Novo Progresso     | Pará               | 7°8'S 55°22'W      | March 1958     | IBSP 5641       |
| <i>A. cajennense s. s.</i>   |                 | 1           | unknown                | Parauapebas        | Pará               | 6°4'S 49°54'W      | September 2012 | IBSP 11590      |
| <i>A. cajennense s. s.</i>   |                 | 1           | unknown                | Parauapebas        | Pará               | 6°4'S 49°54'W      | September 2012 | IBSP 11597      |
| <i>A. cajennense s. s.</i>   |                 | 2           | <i>C. denticulata</i>  | São Félix do Xingu | Pará               | 6°38'S 51°59'W     | April 1999     | IBSP 7735       |
| <i>A. cajennense s. s.</i>   | 1               | 1           | <i>C. denticulata</i>  | São Félix do Xingu | Pará               | 6°38'S 51°59'W     | April 1999     | IBSP 7749       |
| <i>A. cajennense s. s.</i>   | 2               | 1           | free living            | São Félix do Xingu | Pará               | 6°38'S 51°59'W     | April 1999     | IBSP 7751       |
| <i>A. cajennense s. s.</i>   |                 | 1           | free living            | Pimenta Bueno      | Rondônia           | 11°40'S 61°11'W    | July 2000      | IBSP 7794       |
| <i>A. cajennense s. s.</i>   |                 | 3           | free living            | Canarana           | Mato Grosso        | 13°33'S 52°16'W    | December 2000  | IBSP 7627       |
| <i>A. cajennense s. s.</i>   | 8               | 3           | <i>T. terrestris</i>   | São José do Xingu  | Mato Grosso        | 10°48'S 52°44'W    | March 1958     | IBSP 5644       |
| <i>A. cajennense s. s. *</i> |                 | 1           | <i>C. familiaris</i>   | São José do Xingu  | Mato Grosso        | 10°48'S 52°44'W    | October 1969   | IBSP 5951       |
| <i>A. cajennense s. s. *</i> | 8               | 14          | <i>C. familiaris</i>   | Nova Xavantina     | Mato Grosso        | 14°40'S 52°21'W    | September 1969 | IBSP 5950       |
| <i>A. sculptum</i>           | 1               | 1           | <i>E. caballus</i>     | Belém              | Pará               | 1°27'S 48°30'W     | September 1998 | IBSP 6860       |
| <i>A. sculptum</i>           | 1               | 1           | <i>C. thous</i>        | Cuiabá             | Mato Grosso        | 15°35'S 56°5'W     | September 1952 | IBSP 4598       |
| <i>A. sculptum</i>           |                 | 1           | <i>I. iguana</i>       | Cuiabá             | Mato Grosso        | 15°35'S 56°5'W     | April 1997     | IBSP 7702       |
| <i>A. sculptum</i>           | 3               | 5           | <i>M. tridactyla</i>   | Cuiabá             | Mato Grosso        | 15°35'S 56°5'W     | September 2006 | IBSP 7703       |
| <i>A. sculptum</i>           | 8               | 11          | <i>T. terrestris</i>   | Cuiabá             | Mato Grosso        | 15°35'S 56°5'W     | November 1996  | IBSP 7710       |
| <i>A. sculptum</i>           | 2               | 1           | unknown                | Batayporã          | Mato Grosso do Sul | 22°17'S 53°16'W    | February 2001  | IBSP 7308       |
| <i>A. sculptum</i>           | 14              | 18          | free living            | Bonito             | Mato Grosso do Sul | 21°7'S 56°28'W     | October 2002   | IBSP 8929       |
| <i>A. sculptum</i>           | 10              | 10          | free living            | Bonito             | Mato Grosso do Sul | 21°7'S 56°28'W     | October 2002   | IBSP 8930       |
| <i>A. sculptum</i>           | 1               | 10          | free living            | Bonito             | Mato Grosso do Sul | 21°7'S 56°28'W     | October 2002   | IBSP 8931       |
| <i>A. sculptum</i>           | 14              | 12          | free living            | Bonito             | Mato Grosso do Sul | 21°7'S 56°28'W     | October 2002   | IBSP 8932       |
| <i>A. sculptum</i>           |                 | 1           | free living            | Corumbá            | Mato Grosso do Sul | 19°0'S 57°39'W     | January 2000   | IBSP 7634       |
| <i>A. sculptum</i>           |                 | 1           | unknown                | Coxim              | Mato Grosso do Sul | 18°30'S 54°45'W    | June 1952      | IBSP 4532       |
| <i>A. sculptum</i>           | 2               | 1           | <i>T. tetradactyla</i> | Formoso            | Minas Gerais       | 14°56'S 46°13'W    | October 1952   | IBSP 4582       |
| <i>A. sculptum</i>           |                 | 1           | free living            | Itabirito          | Minas Gerais       | 20°15'S 43°48'W    | April 2007     | IBSP 9873       |

|                    |    |    |                        |                       |                    |                  |                |            |
|--------------------|----|----|------------------------|-----------------------|--------------------|------------------|----------------|------------|
| <i>A. sculptum</i> |    | 1  | free living            | Taiobeiras            | Minas Gerais       | 15°48'S 42°13'W  | April 2002     | IBSP 9932  |
| <i>A. sculptum</i> |    | 1  | <i>B. torquatus</i>    | Campos dos Goytacazes | Rio de Janeiro     | 21°45'S 41°19'W  | February 1991  | IBSP 7309  |
| <i>A. sculptum</i> |    | 1  | <i>H. sapiens</i>      | Águas da Prata        | São Paulo          | 21°56'S 46°43'W  | July 2004      | IBSP 9062  |
| <i>A. sculptum</i> |    | 1  | free living            | Águas da Prata        | São Paulo          | 21°56'S 46°43'W  | August 2000    | IBSP 7065  |
| <i>A. sculptum</i> |    | 1  | free living            | Águas da Prata        | São Paulo          | 21°56'S 46°43'W  | March 2003     | IBSP 8757  |
| <i>A. sculptum</i> |    | 1  | unknown                | Águas de São Pedro    | São Paulo          | 22°35'S 47°52'W  | March 2006     | IBSP 9730  |
| <i>A. sculptum</i> |    | 1  | <i>H. sapiens</i>      | Caieiras              | São Paulo          | 23°21'S 46°44'W  | November 2005  | IBSP 9589  |
| <i>A. sculptum</i> |    | 1  | <i>H. sapiens</i>      | Caraguatatuba         | São Paulo          | 23°37'S 45°24'W  | December 2005  | IBSP 9595  |
| <i>A. sculptum</i> | 3  | 10 | <i>H. sapiens</i>      | Caraguatatuba         | São Paulo          | 23°37'S 45°24'W  | December 2006  | IBSP 9596  |
| <i>A. sculptum</i> | 5  | 3  | free living            | Bonito                | Mato Grosso do Sul | 21°7'S 56°28'W   | October 2002   | IBSP 8934  |
| <i>A. sculptum</i> | 5  | 3  | <i>T. terrestris</i>   | Formoso do Araguaia   | Tocantins          | 11°47'S 49°31'W  | December 1953  | IBSP 4946  |
| <i>A. sculptum</i> | 1  | 3  | free living            | Palmas                | Tocantins          | 10°11'S 48°20'W  | June 2001      | IBSP 7349  |
| <i>A. sculptum</i> |    | 1  | free living            | Ilhéus                | Bahia              | 14°47'S 39°2'W   | January 1999   | IBSP 7614  |
| <i>A. sculptum</i> | 5  | 7  | <i>F. catus</i>        | Timbiras              | Maranhão           | 4°15'S 43°56'W   | February 1952  | IBSP 4541  |
| <i>A. sculptum</i> |    | 1  | <i>H. sapiens</i>      | Brasília              | Distrito Federal   | 15°47'S 47°52'W  | May 1998       | IBSP 6895  |
| <i>A. sculptum</i> |    | 1  | <i>H. sapiens</i>      | Ceres                 | Goiás              | 15°18'S 49°35'W  | October 1934   | IBSP 773   |
| <i>A. sculptum</i> | 1  | 3  | unknown                | Jaraguá               | Goiás              | 15°45'S 49°20'W  | August 1934    | IBSP 768   |
| <i>A. sculptum</i> | 4  | 9  | <i>H. hydrochaeris</i> | Pirenópolis           | Goiás              | 15°51'S 48°57'W  | May 1934       | IBSP 769   |
| <i>A. sculptum</i> |    | 1  | <i>D. albiventris</i>  | Campo Grande          | Mato Grosso do Sul | 20°26'S 54°38'W  | July 1997      | IBSP 6888  |
| <i>A. sculptum</i> | 1  | 4  | <i>E. caballus</i>     | Corumbá               | Mato Grosso do Sul | 19°0'S 57°39'W   | January 1998   | IBSP 7030  |
| <i>A. sculptum</i> | 9  | 18 | <i>T. tetradactyla</i> | Miranda               | Mato Grosso do Sul | 20°14'S 56°22'W  | September 1952 | IBSP 4557  |
| <i>A. sculptum</i> |    | 1  | <i>T. tetradactyla</i> | Ponta Porã            | Mato Grosso do Sul | 22°32'S 55°43' W | September 1952 | IBSP 4549  |
| <i>A. sculptum</i> | 21 | 21 | <i>T. terrestris</i>   | Porto Murtinho        | Mato Grosso do Sul | 21°41'S 57°52'W  | October 1952   | IBSP 4962  |
| <i>A. sculptum</i> | 14 | 1  | <i>M. tridactyla</i>   | Ribas do Rio Pardo    | Mato Grosso do Sul | 20°26'S 53°45'W  | October 1952   | IBSP 4544  |
| <i>A. sculptum</i> | 9  | 2  | <i>M. tridactyla</i>   | Ribas do Rio Pardo    | Mato Grosso do Sul | 20°26'S 53°45'W  | October 1952   | IBSP 4547  |
| <i>A. sculptum</i> | 4  | 1  | <i>M. tridactyla</i>   | Ribas do Rio Pardo    | Mato Grosso do Sul | 20°26'S 53°45'W  | September 1952 | IBSP 4554  |
| <i>A. sculptum</i> | 3  | 1  | <i>P. onca</i>         | Mato Verde            | Minas Gerais       | 15°23'S 42°51'W  | April 1950     | IBSP 4538  |
| <i>A. sculptum</i> | 1  | 1  | unknown                | Morada Nova de Minas  | Minas Gerais       | 18°36'S 45°21'W  | January 2009   | IBSP 10848 |
| <i>A. sculptum</i> |    | 1  | unknown                | Ouro Preto            | Minas Gerais       | 20°23'S 43°30'W  | January 2000   | IBSP 7640  |
| <i>A. sculptum</i> |    | 1  | <i>C. prehensilis</i>  | Santa Helena de Minas | Minas Gerais       | 16°58'S 40°41'W  | December 1952  | IBSP 4596  |
| <i>A. sculptum</i> |    | 1  | <i>C. blumenbachii</i> | São João del-Rei      | Minas Gerais       | 21°8'S 44°15'W   | December 1937  | IBSP 1212  |
| <i>A. sculptum</i> |    | 1  | unknown                | São João del-Rei      | Minas Gerais       | 21°8'S 44°15'W   | January 1940   | IBSP 1862  |
| <i>A. sculptum</i> |    | 1  | <i>F. catus</i>        | São João del-Rei      | Minas Gerais       | 21°8'S 44°15'W   | December 1937  | IBSP 1213  |
| <i>A. sculptum</i> | 1  | 1  | <i>H. hydrochaeris</i> | São João del-Rei      | Minas Gerais       | 21°8'S 44°15'W   | November 1937  | IBSP 1206  |
| <i>A. sculptum</i> | 7  | 1  | <i>H. hydrochaeris</i> | São João del-Rei      | Minas Gerais       | 21°8'S 44°15'W   | March 1939     | IBSP 1660  |
| <i>A. sculptum</i> | 3  | 6  | <i>T. terrestris</i>   | São João del-Rei      | Minas Gerais       | 21°8'S 44°15'W   | November 1937  | IBSP 1209  |
| <i>A. sculptum</i> |    | 5  | <i>T. terrestris</i>   | São João del-Rei      | Minas Gerais       | 21°8'S 44°15'W   | March 1939     | IBSP 1659  |
| <i>A. sculptum</i> |    | 2  | <i>T. terrestris</i>   | São João del-Rei      | Minas Gerais       | 21°8'S 44°15'W   | March 1939     | IBSP 1668  |
| <i>A. sculptum</i> | 3  | 1  | <i>H. sapiens</i>      | Resende               | Rio de Janeiro     | 22°28'S 44°26'W  | September 1950 | IBSP 4439  |

|                    |    |    |                        |                  |                |                 |                |            |
|--------------------|----|----|------------------------|------------------|----------------|-----------------|----------------|------------|
| <i>A. sculptum</i> |    | 1  | free living            | Resende          | Rio de Janeiro | 22°28'S 44°26'W | April 1995     | IBSP 7587  |
| <i>A. sculptum</i> | 1  | 1  | unknown                | Rio de Janeiro   | Rio de Janeiro | 22°54'S 43°12'W | November 1938  | IBSP 1534  |
| <i>A. sculptum</i> |    | 2  | <i>E. caballus</i>     | Seropédica       | Rio de Janeiro | 22°44'S 43°42'W | October 2000   | IBSP 7107  |
| <i>A. sculptum</i> | 1  | 1  | unknown                | Amparo           | São Paulo      | 22°42'S 46°45'W | March 2004     | IBSP 8941  |
| <i>A. sculptum</i> |    | 4  | unknown                | Atibaia          | São Paulo      | 23°7'S 46°33'W  | November 1953  | IBSP 4944  |
| <i>A. sculptum</i> | 10 | 13 | <i>E. caballus</i>     | Atibaia          | São Paulo      | 23°7'S 46°33'W  | December 1952  | IBSP 4594  |
| <i>A. sculptum</i> |    | 1  | <i>H. sapiens</i>      | Atibaia          | São Paulo      | 23°7'S 46°33'W  | October 2001   | IBSP 7451  |
| <i>A. sculptum</i> | 5  | 5  | <i>O. aries</i>        | Atibaia          | São Paulo      | 23°7'S 46°33'W  | December 1952  | IBSP 4595  |
| <i>A. sculptum</i> | 3  | 1  | <i>R. rufescens</i>    | Avaré            | São Paulo      | 23°5'S 48°55'W  | August 1934    | IBSP 797   |
| <i>A. sculptum</i> |    | 1  | unknown                | Barueri          | São Paulo      | 23°30'S 46°52'W | June 2006      | IBSP 9753  |
| <i>A. sculptum</i> |    | 1  | unknown                | Barueri          | São Paulo      | 23°30'S 46°52'W | September 2007 | IBSP 10444 |
| <i>A. sculptum</i> | 1  | 1  | unknown                | Barueri          | São Paulo      | 23°30'S 46°52'W | March 2012     | IBSP 10599 |
| <i>A. sculptum</i> | 20 | 4  | unknown                | Bauru            | São Paulo      | 22°18'S 49°3'W  | February 1942  | IBSP 4283  |
| <i>A. sculptum</i> |    | 2  | <i>P. concolor</i>     | Bebedouro        | São Paulo      | 20°56'S 48°28'W | May 1952       | IBSP 4521  |
| <i>A. sculptum</i> |    | 3  | unknown                | Botucatu         | São Paulo      | 22°53'S 48°26'W | February 1942  | IBSP 4418  |
| <i>A. sculptum</i> | 1  | 1  | <i>H. hydrochaeris</i> | Botucatu         | São Paulo      | 22°53'S 48°26'W | September 1997 | IBSP 6892  |
| <i>A. sculptum</i> | 1  | 3  | <i>H. hydrochaeris</i> | Botucatu         | São Paulo      | 22°53'S 48°26'W | September 1997 | IBSP 6896  |
| <i>A. sculptum</i> | 1  | 3  | <i>H. hydrochaeris</i> | Botucatu         | São Paulo      | 22°53'S 48°26'W | September 1997 | IBSP 6899  |
| <i>A. sculptum</i> |    | 1  | <i>E. caballus</i>     | Caçapava         | São Paulo      | 23°6'S 45°42'W  | March 2012     | IBSP 10602 |
| <i>A. sculptum</i> |    | 1  | <i>H. sapiens</i>      | Carapicuíba      | São Paulo      | 23°31'S 46°50'W | November 2005  | IBSP 9551  |
| <i>A. sculptum</i> | 12 | 12 | unknown                | Casa Branca      | São Paulo      | 21°46'S 47°5'W  | January 1937   | IBSP 1035  |
| <i>A. sculptum</i> |    | 1  | <i>H. sapiens</i>      | Catanduva        | São Paulo      | 21°8'S 48°58'W  | December 2005  | IBSP 9611  |
| <i>A. sculptum</i> |    | 1  | free living            | Charqueada       | São Paulo      | 22°30'S 47°46'W | May 1995       | IBSP 6941  |
| <i>A. sculptum</i> |    | 1  | unknown                | Cotia            | São Paulo      | 23°36'S 46°55'W | April 2007     | IBSP 9811  |
| <i>A. sculptum</i> |    | 1  | <i>E. sexcinctus</i>   | Cotia            | São Paulo      | 23°36'S 46°55'W | January 1973   | IBSP 9253  |
| <i>A. sculptum</i> |    | 6  | <i>Holochilus sp.</i>  | Cotia            | São Paulo      | 23°36'S 46°55'W | June 2012      | IBSP 11084 |
| <i>A. sculptum</i> | 1  | 2  | <i>M. gouazoubira</i>  | Cotia            | São Paulo      | 23°36'S 46°55'W | October 1934   | IBSP 839   |
| <i>A. sculptum</i> |    | 1  | <i>H. sapiens</i>      | Embu-Guaçu       | São Paulo      | 23°49'S 46°48'W | January 2010   | IBSP 10374 |
| <i>A. sculptum</i> |    | 1  | <i>H. sapiens</i>      | Francisco Morato | São Paulo      | 23°16'S 46°44'W | November 2005  | IBSP 9548  |
| <i>A. sculptum</i> |    | 1  | <i>H. sapiens</i>      | Francisco Morato | São Paulo      | 23°16'S 46°44'W | November 2005  | IBSP 9549  |
| <i>A. sculptum</i> |    | 1  | <i>H. sapiens</i>      | Francisco Morato | São Paulo      | 23°16'S 46°44'W | December 2005  | IBSP 9594  |
| <i>A. sculptum</i> | 1  | 3  | unknown                | Gália            | São Paulo      | 22°17'S 49°33'W | October 1933   | IBSP 1289  |
| <i>A. sculptum</i> | 4  | 4  | unknown                | Guarulhos        | São Paulo      | 23°27'S 46°31'W | October 2013   | IBSP 11573 |
| <i>A. sculptum</i> |    | 2  | <i>B. taurus</i>       | Herculândia      | São Paulo      | 22°0'S 50°23'W  | October 1952   | IBSP 4577  |
| <i>A. sculptum</i> |    | 4  | <i>H. sapiens</i>      | Ibiúna           | São Paulo      | 23°39'S 47°13'W | December 2005  | IBSP 9606  |
| <i>A. sculptum</i> |    | 1  | unknown                | Iporanga         | São Paulo      | 24°35'S 48°35'W | March 2006     | IBSP 9734  |
| <i>A. sculptum</i> |    | 1  | <i>H. sapiens</i>      | Itapetininga     | São Paulo      | 23°35'S 48°3'W  | February 2006  | IBSP 9625  |
| <i>A. sculptum</i> | 1  | 2  | <i>C. familiaris</i>   | Itapevi          | São Paulo      | 23°32'S 46°56'W | January 1999   | IBSP 6994  |
| <i>A. sculptum</i> |    | 1  | unknown                | Itapevi          | São Paulo      | 23°32'S 46°56'W | November 1999  | IBSP 7176  |

|                    |    |    |                        |                            |           |                 |               |            |
|--------------------|----|----|------------------------|----------------------------|-----------|-----------------|---------------|------------|
| <i>A. sculptum</i> |    | 1  | <i>D. aurita</i>       | Itapevi                    | São Paulo | 23°32'S 46°56'W | November 1999 | IBSP 7235  |
| <i>A. sculptum</i> |    | 1  | free living            | Itapevi                    | São Paulo | 23°32'S 46°56'W | January 2000  | IBSP 7073  |
| <i>A. sculptum</i> | 9  | 13 | <i>M. americana</i>    | Itapura                    | São Paulo | 20°38'S 51°30'W | May 1950      | IBSP 4448  |
| <i>A. sculptum</i> |    | 1  | unknown                | Itupeva                    | São Paulo | 23°9'S 47°3'W   | January 2009  | IBSP 10470 |
| <i>A. sculptum</i> | 6  | 20 | unknown                | Jundiáí                    | São Paulo | 23°11'S 46°53'W | February 2006 | IBSP 9624  |
| <i>A. sculptum</i> | 98 | 2  | <i>H. hydrochaeris</i> | Lins                       | São Paulo | 21°40'S 49°44'W | March 1937    | IBSP 1251  |
| <i>A. sculptum</i> | 5  | 4  | <i>H. hydrochaeris</i> | Lins                       | São Paulo | 21°40'S 49°44'W | November 1937 | IBSP 1392  |
| <i>A. sculptum</i> | 3  | 1  | unknown                | Lorena                     | São Paulo | 22°43'S 45°7'W  | April 1937    | IBSP 1087  |
| <i>A. sculptum</i> | 3  | 3  | <i>M. gouazoubira</i>  | Mairiporã                  | São Paulo | 23°19'S 46°35'W | August 2005   | IBSP 9639  |
| <i>A. sculptum</i> |    | 1  | unknown                | Mogi das Cruzes            | São Paulo | 23°31'S 46°11'W | January 1940  | IBSP 10382 |
| <i>A. sculptum</i> |    | 1  | free living            | Mogi das Cruzes            | São Paulo | 23°31'S 46°11'W | January 2011  | IBSP 1871  |
| <i>A. sculptum</i> |    | 1  | <i>C. familiaris</i>   | Monte Alegre do Sul        | São Paulo | 22°40'S 46°40'W | June 2002     | IBSP 8915  |
| <i>A. sculptum</i> |    | 1  | <i>H. sapiens</i>      | Osasco                     | São Paulo | 23°31'S 46°47'W | May 2001      | IBSP 7302  |
| <i>A. sculptum</i> | 1  | 1  | <i>T. terrestris</i>   | Penápolis                  | São Paulo | 21°25'S 50°4'W  | January 1934  | IBSP 1412  |
| <i>A. sculptum</i> |    | 10 | <i>T. terrestris</i>   | Penápolis                  | São Paulo | 21°25'S 50°4'W  | January 1934  | IBSP 1725  |
| <i>A. sculptum</i> | 28 | 31 | <i>T. terrestris</i>   | Penápolis                  | São Paulo | 21°25'S 50°4'W  | January 1934  | IBSP 1726  |
| <i>A. sculptum</i> |    | 1  | <i>C. familiaris</i>   | Pindamonhangaba            | São Paulo | 22°55'S 45°27'W | December 1934 | IBSP 840   |
| <i>A. sculptum</i> |    | 1  | free living            | Pindamonhangaba            | São Paulo | 22°55'S 45°27'W | May 1998      | IBSP 6940  |
| <i>A. sculptum</i> |    | 21 | <i>H. hydrochaeris</i> | Piracicaba                 | São Paulo | 22°43'S 47°38'W | December 2005 | IBSP 9885  |
| <i>A. sculptum</i> |    | 30 | <i>H. hydrochaeris</i> | Piracicaba                 | São Paulo | 22°43'S 47°38'W | December 2005 | IBSP 9889  |
| <i>A. sculptum</i> |    | 1  | unknown                | Presidente Epitácio        | São Paulo | 21°45'S 52°6'W  | January 1999  | IBSP 7002  |
| <i>A. sculptum</i> | 1  | 1  | <i>S. scrofa</i>       | Ribeirão Pires             | São Paulo | 23°42'S 46°24'W | November 1939 | IBSP 1801  |
| <i>A. sculptum</i> | 3  | 6  | unknown                | Rifaina                    | São Paulo | 20°4'S 47°25'W  | December 1937 | IBSP 1216  |
| <i>A. sculptum</i> | 5  | 1  | <i>P. tajacu</i>       | Rosana                     | São Paulo | 22°34'S 53°3'W  | November 1947 | IBSP 4417  |
| <i>A. sculptum</i> |    | 1  | unknown                | Santa Isabel               | São Paulo | 23°18'S 46°13'W | August 2007   | IBSP 10425 |
| <i>A. sculptum</i> | 1  | 1  | unknown                | Santana de Parnaíba        | São Paulo | 23°26'S 46°55'W | November 2012 | IBSP 11212 |
| <i>A. sculptum</i> |    | 3  | free living            | Santa Rita do Passa Quatro | São Paulo | 21°42'S 47°28'W | February 2002 | IBSP 7486  |
| <i>A. sculptum</i> | 2  | 5  | <i>B. taurus</i>       | São José do Barreiro       | São Paulo | 22°38'S 44°34'W | December 2005 | IBSP 9506  |
| <i>A. sculptum</i> |    | 1  | <i>B. taurus</i>       | São José do Barreiro       | São Paulo | 22°38'S 44°34'W | December 2005 | IBSP 9509  |
| <i>A. sculptum</i> |    | 6  | <i>E. caballus</i>     | São José do Barreiro       | São Paulo | 22°38'S 44°34'W | December 2005 | IBSP 9508  |
| <i>A. sculptum</i> |    | 2  | <i>E. caballus</i>     | São José do Barreiro       | São Paulo | 22°38'S 44°34'W | December 2005 | IBSP 9510  |
| <i>A. sculptum</i> | 4  | 5  | <i>E. caballus</i>     | São José do Barreiro       | São Paulo | 22°38'S 44°34'W | February 2007 | IBSP 9843  |
| <i>A. sculptum</i> |    | 1  | unknown                | São Lourenço da Serra      | São Paulo | 23°51'S 46°56'W | March 2009    | IBSP 10023 |
| <i>A. sculptum</i> | 1  | 1  | <i>E. caballus</i>     | São Lourenço da Serra      | São Paulo | 23°51'S 46°56'W | November 2005 | IBSP 9651  |
| <i>A. sculptum</i> |    | 3  | <i>H. sapiens</i>      | São Lourenço da Serra      | São Paulo | 23°51'S 46°56'W | November 2005 | IBSP 9577  |
| <i>A. sculptum</i> | 1  | 2  | <i>H. sapiens</i>      | São Lourenço da Serra      | São Paulo | 23°51'S 46°56'W | November 2005 | IBSP 9578  |
| <i>A. sculptum</i> | 1  | 1  | <i>H. sapiens</i>      | São Lourenço da Serra      | São Paulo | 23°51'S 46°56'W | November 2005 | IBSP 9579  |
| <i>A. sculptum</i> |    | 1  | <i>A. guariba</i>      | São Paulo                  | São Paulo | 23°32'S 46°38'W | December 2006 | IBSP 9796  |
| <i>A. sculptum</i> |    | 1  | <i>B. taurus</i>       | São Paulo                  | São Paulo | 23°32'S 46°38'W | March 1932    | IBSP 687   |

|                    |   |    |                        |           |           |                 |               |            |
|--------------------|---|----|------------------------|-----------|-----------|-----------------|---------------|------------|
| <i>A. sculptum</i> | 1 | 1  | <i>B. taurus</i>       | São Paulo | São Paulo | 23°32'S 46°38'W | November 1936 | IBSP 943   |
| <i>A. sculptum</i> | 1 | 2  | <i>B. taurus</i>       | São Paulo | São Paulo | 23°32'S 46°38'W | November 1936 | IBSP 945   |
| <i>A. sculptum</i> |   | 1  | <i>B. variegatus</i>   | São Paulo | São Paulo | 23°32'S 46°38'W | August 1935   | IBSP 800   |
| <i>A. sculptum</i> |   | 1  | <i>H. meridionalis</i> | São Paulo | São Paulo | 23°32'S 46°38'W | December 2006 | IBSP 9792  |
| <i>A. sculptum</i> | 2 | 2  | <i>C. familiaris</i>   | São Paulo | São Paulo | 23°32'S 46°38'W | October 1934  | IBSP 841   |
| <i>A. sculptum</i> |   | 1  | <i>C. thous</i>        | São Paulo | São Paulo | 23°32'S 46°38'W | December 1997 | IBSP 6937  |
| <i>A. sculptum</i> | 1 | 13 | "owl"                  | São Paulo | São Paulo | 23°32'S 46°38'W | April 2002    | IBSP 8399  |
| <i>A. sculptum</i> |   | 1  | unknown                | São Paulo | São Paulo | 23°32'S 46°38'W | May 1936      | IBSP 770   |
| <i>A. sculptum</i> |   | 1  | unknown                | São Paulo | São Paulo | 23°32'S 46°38'W | February 1942 | IBSP 4277  |
| <i>A. sculptum</i> |   | 1  | unknown                | São Paulo | São Paulo | 23°32'S 46°38'W | March 2006    | IBSP 9736  |
| <i>A. sculptum</i> |   | 1  | unknown                | São Paulo | São Paulo | 23°32'S 46°38'W | April 2006    | IBSP 9740  |
| <i>A. sculptum</i> |   | 1  | unknown                | São Paulo | São Paulo | 23°32'S 46°38'W | April 2006    | IBSP 9741  |
| <i>A. sculptum</i> |   | 2  | unknown                | São Paulo | São Paulo | 23°32'S 46°38'W | October 2006  | IBSP 9782  |
| <i>A. sculptum</i> |   | 1  | unknown                | São Paulo | São Paulo | 23°32'S 46°38'W | July 2006     | IBSP 9825  |
| <i>A. sculptum</i> |   | 1  | unknown                | São Paulo | São Paulo | 23°32'S 46°38'W | December 1937 | IBSP 1218  |
| <i>A. sculptum</i> | 1 | 3  | unknown                | São Paulo | São Paulo | 23°32'S 46°38'W | January 2010  | IBSP 10377 |
| <i>A. sculptum</i> |   | 1  | unknown                | São Paulo | São Paulo | 23°32'S 46°38'W | August 2007   | IBSP 10467 |
| <i>A. sculptum</i> |   | 1  | <i>D. albiventris</i>  | São Paulo | São Paulo | 23°32'S 46°38'W | October 2006  | IBSP 9796  |
| <i>A. sculptum</i> | 3 | 1  | <i>E. caballus</i>     | São Paulo | São Paulo | 23°32'S 46°38'W | August 1936   | IBSP 683   |
| <i>A. sculptum</i> |   | 1  | <i>E. caballus</i>     | São Paulo | São Paulo | 23°32'S 46°38'W | December 1934 | IBSP 771   |
| <i>A. sculptum</i> | 3 | 2  | <i>E. caballus</i>     | São Paulo | São Paulo | 23°32'S 46°38'W | October 1934  | IBSP 844   |
| <i>A. sculptum</i> | 1 | 1  | <i>E. caballus</i>     | São Paulo | São Paulo | 23°32'S 46°38'W | December 1930 | IBSP 1277  |
| <i>A. sculptum</i> | 2 | 3  | <i>E. caballus</i>     | São Paulo | São Paulo | 23°32'S 46°38'W | December 2007 | IBSP 9968  |
| <i>A. sculptum</i> |   | 1  | <i>H. sapiens</i>      | São Paulo | São Paulo | 23°32'S 46°38'W | January 1940  | IBSP 1825  |
| <i>A. sculptum</i> |   | 1  | <i>H. sapiens</i>      | São Paulo | São Paulo | 23°32'S 46°38'W | November 2005 | IBSP 9555  |
| <i>A. sculptum</i> |   | 1  | <i>H. sapiens</i>      | São Paulo | São Paulo | 23°32'S 46°38'W | November 2005 | IBSP 9571  |
| <i>A. sculptum</i> |   | 1  | <i>H. sapiens</i>      | São Paulo | São Paulo | 23°32'S 46°38'W | January 2006  | IBSP 9616  |
| <i>A. sculptum</i> |   | 1  | <i>H. sapiens</i>      | São Paulo | São Paulo | 23°32'S 46°38'W | January 2006  | IBSP 9617  |
| <i>A. sculptum</i> |   | 1  | <i>H. sapiens</i>      | São Paulo | São Paulo | 23°32'S 46°38'W | January 2006  | IBSP 9618  |
| <i>A. sculptum</i> |   | 1  | <i>H. sapiens</i>      | São Paulo | São Paulo | 23°32'S 46°38'W | January 2006  | IBSP 9619  |
| <i>A. sculptum</i> |   | 1  | <i>H. hydrochaeris</i> | São Paulo | São Paulo | 23°32'S 46°38'W | March 2004    | IBSP 8940  |
| <i>A. sculptum</i> |   | 1  | <i>H. hydrochaeris</i> | São Paulo | São Paulo | 23°32'S 46°38'W | December 2003 | IBSP 8912  |
| <i>A. sculptum</i> | 1 | 1  | <i>H. hydrochaeris</i> | São Paulo | São Paulo | 23°32'S 46°38'W | October 2002  | IBSP 7989  |
| <i>A. sculptum</i> | 5 | 7  | <i>H. hydrochaeris</i> | São Paulo | São Paulo | 23°32'S 46°38'W | June 2002     | IBSP 7760  |
| <i>A. sculptum</i> |   | 2  | <i>H. hydrochaeris</i> | São Paulo | São Paulo | 23°32'S 46°38'W | February 2002 | IBSP 7562  |
| <i>A. sculptum</i> |   | 1  | <i>H. hydrochaeris</i> | São Paulo | São Paulo | 23°32'S 46°38'W | February 2002 | IBSP 7484  |
| <i>A. sculptum</i> | 1 | 3  | <i>H. hydrochaeris</i> | São Paulo | São Paulo | 23°32'S 46°38'W | January 2002  | IBSP 7459  |
| <i>A. sculptum</i> | 2 | 2  | <i>H. hydrochaeris</i> | São Paulo | São Paulo | 23°32'S 46°38'W | October 2001  | IBSP 7444  |
| <i>A. sculptum</i> |   | 3  | <i>H. hydrochaeris</i> | São Paulo | São Paulo | 23°32'S 46°38'W | October 2001  | IBSP 7440  |

|                            |    |    |                        |                    |                    |                 |                |            |
|----------------------------|----|----|------------------------|--------------------|--------------------|-----------------|----------------|------------|
| <i>A. sculptum</i>         |    | 4  | <i>H. hydrochaeris</i> | São Paulo          | São Paulo          | 23°32'S 46°38'W | September 2000 | IBSP 7049  |
| <i>A. sculptum</i>         | 1  | 1  | <i>M. gouazoubira</i>  | São Paulo          | São Paulo          | 23°32'S 46°38'W | August 2006    | IBSP 9775  |
| <i>A. sculptum</i>         |    | 1  | <i>M. tridactyla</i>   | São Paulo          | São Paulo          | 23°32'S 46°38'W | January 1940   | IBSP 1861  |
| <i>A. sculptum</i>         |    | 1  | <i>S. villosus</i>     | São Paulo          | São Paulo          | 23°32'S 46°38'W | September 2002 | IBSP 7967  |
| <i>A. sculptum</i>         | 1  | 1  | <i>S. scrofa</i>       | São Paulo          | São Paulo          | 23°32'S 46°38'W | May 1939       | IBSP 1717  |
| <i>A. sculptum</i>         |    | 1  | free living            | São Paulo          | São Paulo          | 23°32'S 46°38'W | April 1938     | IBSP 1307  |
| <i>A. sculptum</i>         | 2  | 5  | free living            | São Paulo          | São Paulo          | 23°32'S 46°38'W | January 1940   | IBSP 1827  |
| <i>A. sculptum</i>         |    | 2  | free living            | São Paulo          | São Paulo          | 23°32'S 46°38'W | February 1940  | IBSP 1874  |
| <i>A. sculptum</i>         | 3  | 1  | free living            | São Paulo          | São Paulo          | 23°32'S 46°38'W | December 2000  | IBSP 7060  |
| <i>A. sculptum</i>         |    | 1  | free living            | São Paulo          | São Paulo          | 23°32'S 46°38'W | October 2000   | IBSP 7061  |
| <i>A. sculptum</i>         | 4  | 13 | free living            | São Paulo          | São Paulo          | 23°32'S 46°38'W | November 2000  | IBSP 7169  |
| <i>A. sculptum</i>         | 1  | 1  | free living            | São Paulo          | São Paulo          | 23°32'S 46°38'W | April 2001     | IBSP 7286  |
| <i>A. sculptum</i>         |    | 1  | free living            | São Paulo          | São Paulo          | 23°32'S 46°38'W | May 2001       | IBSP 7305  |
| <i>A. sculptum</i>         |    | 1  | free living            | São Paulo          | São Paulo          | 23°32'S 46°38'W | November 2000  | IBSP 7429  |
| <i>A. sculptum</i>         |    | 2  | unknown                | São Roque          | São Paulo          | 23°31'S 47°8'W  | March 2000     | IBSP 7209  |
| <i>A. sculptum</i>         |    | 1  | unknown                | São Roque          | São Paulo          | 23°31'S 47°8'W  | April 2000     | IBSP 7211  |
| <i>A. sculptum</i>         | 1  | 2  | unknown                | São Roque          | São Paulo          | 23°31'S 47°8'W  | April 2000     | IBSP 7217  |
| <i>A. sculptum</i>         |    | 1  | <i>B. variegatus</i>   | Sorocaba           | São Paulo          | 23°30'S 47°27'W | September 1934 | IBSP 843   |
| <i>A. sculptum</i>         |    | 1  | <i>H. sapiens</i>      | Taubaté            | São Paulo          | 23°1'S 45°33'W  | November 2007  | IBSP 9783  |
| <i>A. sculptum</i>         | 1  | 1  | <i>H. sapiens</i>      | Teodoro Sampaio    | São Paulo          | 22°31'S 52°10'W | April 1951     | IBSP 4463  |
| <i>A. sculptum</i>         | 16 | 29 | <i>H. sapiens</i>      | Ubatuba            | São Paulo          | 23°26'S 45°4'W  | November 2005  | IBSP 9564  |
| <i>A. sculptum</i>         |    | 1  | <i>H. sapiens</i>      | Ubatuba            | São Paulo          | 23°26'S 45°4'W  | November 2005  | IBSP 9565  |
| <i>A. sculptum</i>         |    | 1  | <i>H. sapiens</i>      | Ubatuba            | São Paulo          | 23°26'S 45°4'W  | November 2005  | IBSP 9584  |
| <i>A. sculptum</i>         | 1  | 2  | <i>H. sapiens</i>      | Ubatuba            | São Paulo          | 23°26'S 45°4'W  | December 2005  | IBSP 9601  |
| <i>A. sculptum</i>         |    | 1  | <i>C. familiaris</i>   | Valinhos           | São Paulo          | 22°58'S 46°59'W | October 2002   | IBSP 7990  |
| <i>A. sculptum</i>         |    | 1  | free living            | Londrina           | Paraná             | 23°18'S 51°9'W  | March 2005     | IBSP 10483 |
| <i>A. sculptum</i>         | 6  | 6  | <i>H. sapiens</i>      | Reserva do Cabaçal | Mato Grosso        | 15°4'S 58°27'W  | March 2002     | IBSP 7647  |
| <i>A. sculptum</i>         | 2  | 1  | free living            | Corumbá            | Mato Grosso do Sul | 19°0'S 57°39'W  | June 1998      | IBSP 6919  |
| <i>A. sculptum</i>         |    | 1  | free living            | Corumbá            | Mato Grosso do Sul | 19°0'S 57°39'W  | November 1998  | IBSP 7416  |
| <i>A. sculptum</i>         | 5  | 4  | <i>T. terrestris</i>   | Aimorés            | Minas Gerais       | 19°29'S 41°3'W  | August 1950    | IBSP 4436  |
| <i>A. sculptum</i> *       |    | 1  | <i>D. azarae</i>       | Miranda            | Mato Grosso do Sul | 20°14'S 56°22'W | August 1952    | IBSP 4542  |
| <i>A. sculptum</i> *       |    | 1  | <i>T. tetradactyla</i> | Miranda            | Mato Grosso do Sul | 20°14'S 56°22'W | September 1952 | IBSP 4581  |
| <i>A. sculptum</i> *       | 9  | 7  | <i>D. aurita</i>       | Além Paraíba       | Minas Gerais       | 21°53'S 42°42'W | October 1955   | IBSP 3843  |
| <i>A. cajennense s. l.</i> | 1  |    | free living            | Ilhéus             | Bahia              | 14°47'S 39°2'W  | January 1999   | IBSP 7615  |
| <i>A. cajennense s. l.</i> | 1  |    | free living            | Jussari            | Bahia              | 15°11'S 39°29'W | April 1998     | IBSP 7043  |
| <i>A. cajennense s. l.</i> | 3  |    | free living            | Bonito             | Mato Grosso do Sul | 21°7'S 56°28'W  | October 2002   | IBSP 8933  |
| <i>A. cajennense s. l.</i> | 1  |    | free living            | Corumbá            | Mato Grosso do Sul | 19°0'S 57°39'W  | January 2000   | IBSP 7635  |
| <i>A. cajennense s. l.</i> | 1  |    | free living            | Corumbá            | Mato Grosso do Sul | 19°0'S 57°39'W  | August 2005    | IBSP 9513  |
| <i>A. cajennense s. l.</i> | 4  |    | <i>P. tajacu</i>       | Araguari           | Minas Gerais       | 18°38'S 48°11'W | October 1951   | IBSP 4494  |

|                            |    |  |                        |                     |                    |                 |                |            |
|----------------------------|----|--|------------------------|---------------------|--------------------|-----------------|----------------|------------|
| <i>A. cajennense s. l.</i> | 1  |  | unknown                | Matozinhos          | Minas Gerais       | 19°33'S 44°4'W  | March 2013     | IBSP 11602 |
| <i>A. cajennense s. l.</i> | 3  |  | <i>C. familiaris</i>   | Álvares Machado     | São Paulo          | 22°4'S 51°28'W  | October 1951   | IBSP 4486  |
| <i>A. cajennense s. l.</i> | 1  |  | unknown                | Igaratá             | São Paulo          | 23°12'S 46°9'W  | November 2007  | IBSP 9788  |
| <i>A. cajennense s. l.</i> | 2  |  | <i>C. familiaris</i>   | Itatiba             | São Paulo          | 23°0'S 46°50'W  | July 2011      | IBSP 10557 |
| <i>A. cajennense s. l.</i> | 1  |  | unknown                | Itatiba             | São Paulo          | 23°0'S 46°50'W  | April 2007     | IBSP 9824  |
| <i>A. cajennense s. l.</i> | 1  |  | unknown                | Itirapina           | São Paulo          | 22°15'S 47°49'W | December 2000  | IBSP 9056  |
| <i>A. cajennense s. l.</i> | 1  |  | unknown                | Itú                 | São Paulo          | 23°15'S 47°17'W | May 2005       | IBSP 10035 |
| <i>A. cajennense s. l.</i> | 1  |  | unknown                | Ipueiras            | Tocantins          | 11°14'S 48°27'W | September 2001 | IBSP 7607  |
| <i>A. cajennense s. l.</i> | 5  |  | <i>S. scrofa</i>       | Macapá              | Amapá              | 0°2'N 51°3'W    | March 1983     | IBSP 7101  |
| <i>A. cajennense s. l.</i> | 1  |  | unknown                | Manaus              | Amazonas           | 3°6'S 60°1'W    | May 1955       | IBSP 5732  |
| <i>A. cajennense s. l.</i> | 1  |  | free living            | Canaã dos Carajás   | Pará               | 6°29'S 49°52'W  | December 1970  | IBSP 6861  |
| <i>A. cajennense s. l.</i> | 1  |  | <i>H. sapiens</i>      | Monte Alegre        | Pará               | 2°0'S 54°4'W    | October 2007   | IBSP 9895  |
| <i>A. cajennense s. l.</i> | 2  |  | <i>Bradypus sp</i>     | Tucuruí             | Pará               | 3°46'S 49°40'W  | July 1984      | IBSP 6775  |
| <i>A. cajennense s. l.</i> | 1  |  | unknown                | Tucuruí             | Pará               | 3°46'S 49°40'W  | July 1984      | IBSP 6773  |
| <i>A. cajennense s. l.</i> | 1  |  | <i>H. sapiens</i>      | Tucuruí             | Pará               | 3°46'S 49°40'W  | July 1984      | IBSP 6755  |
| <i>A. cajennense s. l.</i> | 1  |  | <i>H. sapiens</i>      | Tucuruí             | Pará               | 3°46'S 49°40'W  | July 1984      | IBSP 6767  |
| <i>A. cajennense s. l.</i> | 1  |  | free living            | Ilhéus              | Bahia              | 14°47'S 39°2'W  | January 1999   | IBSP 7612  |
| <i>A. cajennense s. l.</i> | 3  |  | <i>M. tridactyla</i>   | Bataguassu          | Mato Grosso do Sul | 21°42'S 52°25'W | April 2001     | IBSP 7284  |
| <i>A. cajennense s. l.</i> | 1  |  | unknown                | Campo Grande        | Mato Grosso do Sul | 20°26'S 54°38'W | July 1995      | IBSP 7585  |
| <i>A. cajennense s. l.</i> | 1  |  | unknown                | Corumbá             | Mato Grosso do Sul | 19°0'S 57°39'W  | May 1999       | IBSP 7419  |
| <i>A. cajennense s. l.</i> | 1  |  | <i>H. sapiens</i>      | Corumbá             | Mato Grosso do Sul | 19°0'S 57°39'W  | August 2005    | IBSP 9515  |
| <i>A. cajennense s. l.</i> | 1  |  | free living            | Corumbá             | Mato Grosso do Sul | 19°0'S 57°39'W  | January 2000   | IBSP 7631  |
| <i>A. cajennense s. l.</i> | 1  |  | free living            | Corumbá             | Mato Grosso do Sul | 19°0'S 57°39'W  | January 2000   | IBSP 7632  |
| <i>A. cajennense s. l.</i> | 1  |  | free living            | Corumbá             | Mato Grosso do Sul | 19°0'S 57°39'W  | January 2000   | IBSP 7633  |
| <i>A. cajennense s. l.</i> | 1  |  | free living            | Ivinhema            | Mato Grosso do Sul | 22°18'S 53°48'W | January 2004   | IBSP 9351  |
| <i>A. cajennense s. l.</i> | 18 |  | <i>M. tridactyla</i>   | Maracaju            | Mato Grosso do Sul | 21°36'S 55°10'W | October 1952   | IBSP 4563  |
| <i>A. cajennense s. l.</i> | 1  |  | <i>T. tetradactyla</i> | Miranda             | Mato Grosso do Sul | 20°14'S 56°22'W | September 1952 | IBSP 4570  |
| <i>A. cajennense s. l.</i> | 14 |  | <i>M. tridactyla</i>   | Ribas do Rio Pardo  | Mato Grosso do Sul | 20°26'S 53°45'W | October 1952   | IBSP 4546  |
| <i>A. cajennense s. l.</i> | 5  |  | <i>M. tridactyla</i>   | Ribas do Rio Pardo  | Mato Grosso do Sul | 20°26'S 53°45'W | September 1952 | IBSP 4578  |
| <i>A. cajennense s. l.</i> | 1  |  | free living            | Santa Rita do Pardo | Mato Grosso do Sul | 21°18'S 52°49'W | April 2001     | IBSP 7479  |
| <i>A. cajennense s. l.</i> | 2  |  | <i>T. terrestris</i>   | Três Lagoas         | Mato Grosso do Sul | 20°45'S 51°40'W | January 1952   | IBSP 4509  |
| <i>A. cajennense s. l.</i> | 1  |  | <i>H. sapiens</i>      | Juatuba             | Minas Gerais       | 19°57'S 44°20'W | April 2002     | IBSP 7649  |
| <i>A. cajennense s. l.</i> | 4  |  | <i>H. hydrochaeris</i> | São João del-Rei    | Minas Gerais       | 21°8'S 44°15'W  | May 1938       | IBSP 1656  |
| <i>A. cajennense s. l.</i> | 2  |  | <i>T. terrestris</i>   | São Romão           | Minas Gerais       | 16°22'S 45°4'W  | April 1939     | IBSP 1893  |
| <i>A. cajennense s. l.</i> | 1  |  | unknown                | Paraty              | Rio de Janeiro     | 23°13'S 44°42'W | August 2006    | IBSP 9755  |
| <i>A. cajennense s. l.</i> | 1  |  | <i>E. caballus</i>     | Rio de Janeiro      | Rio de Janeiro     | 22°54'S 43°12'W | January 1930   | IBSP 842   |
| <i>A. cajennense s. l.</i> | 1  |  | <i>E. caballus</i>     | Seropédica          | Rio de Janeiro     | 22°44'S 43°42'W | June 2003      | IBSP 8748  |
| <i>A. cajennense s. l.</i> | 1  |  | <i>E. caballus</i>     | Seropédica          | Rio de Janeiro     | 22°44'S 43°42'W | June 2003      | IBSP 8751  |
| <i>A. cajennense s. l.</i> | 23 |  | <i>E. caballus</i>     | Araçariguama        | São Paulo          | 23°26'S 47°3'W  | November 2007  | IBSP 10056 |

|                            |    |  |                        |                        |           |                 |                |            |
|----------------------------|----|--|------------------------|------------------------|-----------|-----------------|----------------|------------|
| <i>A. cajennense s. l.</i> | 1  |  | unknown                | Araraquara             | São Paulo | 21°47'S 48°10'W | January 2010   | IBSP 10379 |
| <i>A. cajennense s. l.</i> | 1  |  | <i>S. nigritus</i>     | Bebedouro              | São Paulo | 20°56'S 48°28'W | October 1950   | IBSP 4451  |
| <i>A. cajennense s. l.</i> | 1  |  | <i>H. hydrochaeris</i> | Botucatu               | São Paulo | 22°53'S 48°26'W | September 1997 | IBSP 6897  |
| <i>A. cajennense s. l.</i> | 2  |  | <i>H. hydrochaeris</i> | Botucatu               | São Paulo | 22°53'S 48°26'W | September 1997 | IBSP 6898  |
| <i>A. cajennense s. l.</i> | 1  |  | <i>H. hydrochaeris</i> | Botucatu               | São Paulo | 22°53'S 48°26'W | September 1997 | IBSP 6900  |
| <i>A. cajennense s. l.</i> | 3  |  | <i>H. hydrochaeris</i> | Botucatu               | São Paulo | 22°53'S 48°26'W | September 1997 | IBSP 6901  |
| <i>A. cajennense s. l.</i> | 1  |  | unknown                | Bragança Paulista      | São Paulo | 22°57'S 46°32'W | November 2006  | IBSP 9791  |
| <i>A. cajennense s. l.</i> | 1  |  | <i>H. sapiens</i>      | Bragança Paulista      | São Paulo | 22°57'S 46°32'W | November 2005  | IBSP 9572  |
| <i>A. cajennense s. l.</i> | 1  |  | <i>H. sapiens</i>      | Caieiras               | São Paulo | 23°21'S 46°44'W | November 2005  | IBSP 9588  |
| <i>A. cajennense s. l.</i> | 1  |  | unknown                | Carapicuíba            | São Paulo | 23°31'S 46°50'W | May 2013       | IBSP 11245 |
| <i>A. cajennense s. l.</i> | 61 |  | <i>E. caballus</i>     | Colina                 | São Paulo | 20°42'S 48°32'W | October 1957   | IBSP 5177  |
| <i>A. cajennense s. l.</i> | 1  |  | <i>M. tridactyla</i>   | Conchas                | São Paulo | 23°0'S 48°0'W   | October 1952   | IBSP 4560  |
| <i>A. cajennense s. l.</i> | 1  |  | unknown                | Embu-Guaçu             | São Paulo | 23°49'S 46°48'W | December 2012  | IBSP 11122 |
| <i>A. cajennense s. l.</i> | 2  |  | unknown                | Gália                  | São Paulo | 22°17'S 49°33'W | October 1933   | IBSP 1290  |
| <i>A. cajennense s. l.</i> | 1  |  | free living            | Guararema              | São Paulo | 23°24'S 46°2'W  | February 2002  | IBSP 7482  |
| <i>A. cajennense s. l.</i> | 1  |  | free living            | Guarulhos              | São Paulo | 23°27'S 46°31'W | September 2001 | IBSP 7427  |
| <i>A. cajennense s. l.</i> | 1  |  | <i>E. caballus</i>     | Itapevi                | São Paulo | 23°32'S 46°56'W | October 2000   | IBSP 7216  |
| <i>A. cajennense s. l.</i> | 1  |  | free living            | Itapevi                | São Paulo | 23°32'S 46°56'W | December 1999  | IBSP 7178  |
| <i>A. cajennense s. l.</i> | 2  |  | <i>H. hydrochaeris</i> | Lins                   | São Paulo | 21°40'S 49°44'W | December 1937  | IBSP 1227  |
| <i>A. cajennense s. l.</i> | 1  |  | <i>E. caballus</i>     | Mogi Guaçu             | São Paulo | 22°22'S 46°56'W | January 2010   | IBSP 10380 |
| <i>A. cajennense s. l.</i> | 1  |  | <i>T. terrestris</i>   | Penápolis              | São Paulo | 21°25'S 50°4'W  | January 1934   | IBSP 1724  |
| <i>A. cajennense s. l.</i> | 1  |  | free living            | Pindamonhangaba        | São Paulo | 22°55'S 45°27'W | September 1995 | IBSP 6952  |
| <i>A. cajennense s. l.</i> | 29 |  | <i>H. hydrochaeris</i> | Piracicaba             | São Paulo | 22°43'S 47°38'W | December 2005  | IBSP 9881  |
| <i>A. cajennense s. l.</i> | 30 |  | <i>H. hydrochaeris</i> | Piracicaba             | São Paulo | 22°43'S 47°38'W | December 2005  | IBSP 9882  |
| <i>A. cajennense s. l.</i> | 30 |  | <i>H. hydrochaeris</i> | Piracicaba             | São Paulo | 22°43'S 47°38'W | December 2005  | IBSP 9884  |
| <i>A. cajennense s. l.</i> | 25 |  | <i>H. hydrochaeris</i> | Piracicaba             | São Paulo | 22°43'S 47°38'W | December 2005  | IBSP 9886  |
| <i>A. cajennense s. l.</i> | 60 |  | <i>H. hydrochaeris</i> | Piracicaba             | São Paulo | 22°43'S 47°38'W | December 2005  | IBSP 9888  |
| <i>A. cajennense s. l.</i> | 1  |  | unknown                | Santa Isabel           | São Paulo | 23°18'S 46°13'W | March 2008     | IBSP 10418 |
| <i>A. cajennense s. l.</i> | 1  |  | free living            | Santa Isabel           | São Paulo | 23°18'S 46°13'W | October 1996   | IBSP 6951  |
| <i>A. cajennense s. l.</i> | 1  |  | free living            | Santa Isabel           | São Paulo | 23°18'S 46°13'W | October 1996   | IBSP 6954  |
| <i>A. cajennense s. l.</i> | 1  |  | free living            | Santa Isabel           | São Paulo | 23°18'S 46°13'W | October 1996   | IBSP 6955  |
| <i>A. cajennense s. l.</i> | 1  |  | unknown                | Santo André            | São Paulo | 23°39'S 46°32'W | November 2006  | IBSP 9790  |
| <i>A. cajennense s. l.</i> | 1  |  | <i>M. tridactyla</i>   | São Bernardo do Campo  | São Paulo | 23°41'S 46°33'W | December 1999  | IBSP 7164  |
| <i>A. cajennense s. l.</i> | 1  |  | free living            | São José dos Campos    | São Paulo | 23°10'S 45°53'W | December 2007  | IBSP 9967  |
| <i>A. cajennense s. l.</i> | 1  |  | <i>H. sapiens</i>      | São Lourenço da Serra  | São Paulo | 23°51'S 46°56'W | November 2005  | IBSP 9586  |
| <i>A. cajennense s. l.</i> | 1  |  | <i>H. sapiens</i>      | São Lourenço da Serra  | São Paulo | 23°51'S 46°56'W | November 2005  | IBSP 9593  |
| <i>A. cajennense s. l.</i> | 1  |  | unknown                | São Luiz do Paraitinga | São Paulo | 23°13'S 45°18'W | March 2007     | IBSP 9805  |
| <i>A. cajennense s. l.</i> | 1  |  | unknown                | São Luiz do Paraitinga | São Paulo | 23°13'S 45°18'W | March 2006     | IBSP 9732  |
| <i>A. cajennense s. l.</i> | 2  |  | <i>B. taurus</i>       | São Paulo              | São Paulo | 23°32'S 46°38'W | November 1936  | IBSP 958   |



|                            |                         |                        |                        |                        |                |                           |                |                            |
|----------------------------|-------------------------|------------------------|------------------------|------------------------|----------------|---------------------------|----------------|----------------------------|
| <i>A. cajennense s. l.</i> | 1                       |                        | <i>C. thous</i>        | São Paulo              | São Paulo      | 23°32'S 46°38'W           | November 1934  | IBSP 838                   |
| <i>A. cajennense s. l.</i> | 1                       |                        | <i>C. thous</i>        | São Paulo              | São Paulo      | 23°32'S 46°38'W           | December 1999  | IBSP 7157                  |
| <i>A. cajennense s. l.</i> | 1                       |                        | unknown                | São Paulo              | São Paulo      | 23°32'S 46°38'W           | April 2006     | IBSP 9743                  |
| <i>A. cajennense s. l.</i> | 1                       |                        | unknown                | São Paulo              | São Paulo      | 23°32'S 46°38'W           | August 2007    | IBSP 9846                  |
| <i>A. cajennense s. l.</i> | 1                       |                        | unknown                | São Paulo              | São Paulo      | 23°32'S 46°38'W           | July 2013      | IBSP 11286                 |
| <i>A. cajennense s. l.</i> | 1                       |                        | <i>E. caballus</i>     | São Paulo              | São Paulo      | 23°32'S 46°38'W           | June 2003      | IBSP 8748                  |
| <i>A. cajennense s. l.</i> | 1                       |                        | <i>E. caballus</i>     | São Paulo              | São Paulo      | 23°32'S 46°38'W           | June 2003      | IBSP 8751                  |
| <i>A. cajennense s. l.</i> | 2                       |                        | <i>H. sapiens</i>      | São Paulo              | São Paulo      | 23°32'S 46°38'W           | March 1932     | IBSP 685                   |
| <i>A. cajennense s. l.</i> | 1                       |                        | <i>H. sapiens</i>      | São Paulo              | São Paulo      | 23°32'S 46°38'W           | March 1937     | IBSP 1082                  |
| <i>A. cajennense s. l.</i> | 1                       |                        | <i>H. sapiens</i>      | São Paulo              | São Paulo      | 23°32'S 46°38'W           | August 1940    | IBSP 1992                  |
| <i>A. cajennense s. l.</i> | 1                       |                        | <i>H. sapiens</i>      | São Paulo              | São Paulo      | 23°32'S 46°38'W           | November 2005  | IBSP 9566                  |
| <i>A. cajennense s. l.</i> | 1                       |                        | <i>H. sapiens</i>      | São Paulo              | São Paulo      | 23°32'S 46°38'W           | November 2005  | IBSP 9580                  |
| <i>A. cajennense s. l.</i> | 1                       |                        | <i>H. sapiens</i>      | São Paulo              | São Paulo      | 23°32'S 46°38'W           | December 2005  | IBSP 9599                  |
| <i>A. cajennense s. l.</i> | 1                       |                        | <i>H. sapiens</i>      | São Paulo              | São Paulo      | 23°32'S 46°38'W           | December 2005  | IBSP 9608                  |
| <i>A. cajennense s. l.</i> | 1                       |                        | <i>H. sapiens</i>      | São Paulo              | São Paulo      | 23°32'S 46°38'W           | February 2006  | IBSP 9623                  |
| <i>A. cajennense s. l.</i> | 1                       |                        | <i>H. sapiens</i>      | São Paulo              | São Paulo      | 23°32'S 46°38'W           | February 2006  | IBSP 9626                  |
| <i>A. cajennense s. l.</i> | 6                       |                        | <i>H. hydrochaeris</i> | São Paulo              | São Paulo      | 23°32'S 46°38'W           | March 1939     | IBSP 1776                  |
| <i>A. cajennense s. l.</i> | 1                       |                        | <i>H. hydrochaeris</i> | São Paulo              | São Paulo      | 23°32'S 46°38'W           | June 1937      | IBSP 1101                  |
| <i>A. cajennense s. l.</i> | 9                       |                        | <i>H. hydrochaeris</i> | São Paulo              | São Paulo      | 23°32'S 46°38'W           | December 1997  | IBSP 6938                  |
| <i>A. cajennense s. l.</i> | 1                       |                        | <i>M. tridactyla</i>   | São Paulo              | São Paulo      | 23°32'S 46°38'W           | October 1952   | IBSP 4572                  |
| <i>A. cajennense s. l.</i> | 1                       |                        | <i>R. magnirostris</i> | São Paulo              | São Paulo      | 23°32'S 46°38'W           | October 2004   | IBSP 9650                  |
| <i>A. cajennense s. l.</i> | 1                       |                        | <i>H. sapiens</i>      | Vargem Grande Paulista | São Paulo      | 23°36'S 47°1'W            | November 2005  | IBSP 9592                  |
| <i>A. cajennense s. l.</i> | 1                       |                        | <i>C. thous</i>        | Japurá                 | Paraná         | 23°28'S 52°33'W           | December 1952  | IBSP 4599                  |
| <i>A. cajennense s. l.</i> | 2                       |                        | unknown                | São José dos Pinhais   | Paraná         | 25°32'S 49°12'W           | April 1937     | IBSP 1089                  |
| <i>A. cajennense s. l.</i> | 1                       |                        | <i>C. familiaris</i>   | Presidente Getúlio     | Santa Catarina | 27°3'S 49°37'W            | August 1936    | IBSP 499                   |
| <i>A. cajennense s. l.</i> | 1                       |                        | unknown                | Parauapebas            | Pará           | 6°4'S 49°54'W             | September 2012 | IBSP 11600                 |
| <i>A. cajennense s. l.</i> | 1                       |                        | <i>H. sapiens</i>      | Santana do Riacho      | Minas Gerais   | 19°10'S 43°42'W           | September 2006 | IBSP 9848                  |
| <i>A. cajennense s. l.</i> | 6                       |                        | <i>E. caballus</i>     | Araçariguama           | São Paulo      | 23°26'S 47°3'W            | November 2007  | IBSP 10055                 |
| <i>A. cajennense s. l.</i> | 1                       |                        | unknown                | Osasco                 | São Paulo      | 23°31'S 46°47'W           | April 2006     | IBSP 9739                  |
| <i>A. cajennense s. l.</i> | 1                       |                        | unknown                | Ourinhos               | São Paulo      | 22°58'S 49°52'W           | October 1999   | IBSP 7153                  |
| <b>Tick species</b>        | <b>No. Males<br/>**</b> | <b>No.<br/>Females</b> | <b>host</b>            | <b>municipality</b>    | <b>state</b>   | <b>latitude longitude</b> | <b>date</b>    | <b>Acession<br/>number</b> |
| <b>CNC</b>                 |                         |                        |                        |                        |                |                           |                |                            |
| <i>A. cajennense s. s.</i> | 1                       | 3                      | free living            | Altamira               | Pará           | 3°12'S 52°12'W            | August 2012    | CNC 2244                   |
| <i>A. cajennense s. s.</i> | 3                       | 2                      | <i>M. tridactyla</i>   | Belém                  | Pará           | 1°27'S 48°30'W            | September 2011 | CNC 2615                   |
| <i>A. cajennense s. s.</i> | 1                       | 1                      | <i>C. paca</i>         | Marabá                 | Pará           | 5°22'S 49°7'W             | June 2001      | CNC 499                    |
| <i>A. cajennense s. s.</i> | 3                       | 3                      | <i>T. terrestris</i>   | Marabá                 | Pará           | 5°22'S 49°7'W             | July 2001      | CNC 502                    |
| <i>A. cajennense s. s.</i> | 1                       | 5                      | <i>T. terrestris</i>   | Parauapebas            | Pará           | 6°4'S 49°54'W             | November 2003  | CNC 827                    |
| <i>A. cajennense s. s.</i> | 2                       | 2                      | free living            | Porto de Moz           | Pará           | 1°44'S 52°14'W            | March 2013     | CNC 2416                   |

|                            |    |    |                        |                           |             |                 |                |          |
|----------------------------|----|----|------------------------|---------------------------|-------------|-----------------|----------------|----------|
| <i>A. cajennense s. s.</i> | 2  | 1  | <i>S. caffer</i>       | Santa Isabel do Pará      | Pará        | 1°17'S 48°9'W   | July 2009      | CNC 2616 |
| <i>A. cajennense s. s.</i> | 3  |    | <i>E. caballus</i>     | São Domingos do Capim     | Pará        | 1°40'S 47°46'W  | October 2011   | CNC 2617 |
| <i>A. cajennense s. s.</i> | 5  | 10 | free living            | Campo Novo de Rondônia    | Rondônia    | 10°35'S 63°36'W | April 2001     | CNC 446  |
| <i>A. cajennense s. s.</i> | 8  | 1  | <i>E. caballus</i>     | Governador Jorge Teixeira | Rondônia    | 10°31'S 62°38'W | January 2009   | CNC 1410 |
| <i>A. cajennense s. s.</i> | 14 | 21 | free living            | Governador Jorge Teixeira | Rondônia    | 10°31'S 62°38'W | December 2008  | CNC 1808 |
| <i>A. cajennense s. s.</i> |    | 1  | <i>P. tajacu</i>       | Governador Jorge Teixeira | Rondônia    | 10°31'S 62°38'W | November 2000  | CNC 415  |
| <i>A. cajennense s. s.</i> | 1  | 4  | free living            | Governador Jorge Teixeira | Rondônia    | 10°31'S 62°38'W | June 2001      | CNC 492  |
| <i>A. cajennense s. s.</i> | 1  | 1  | free living            | Governador Jorge Teixeira | Rondônia    | 10°31'S 62°38'W | October 2001   | CNC 577  |
| <i>A. cajennense s. s.</i> | 24 | 26 | free living            | Governador Jorge Teixeira | Rondônia    | 10°31'S 62°38'W | December 2001  | CNC 627  |
| <i>A. cajennense s. s.</i> | 6  | 4  | free living            | Governador Jorge Teixeira | Rondônia    | 10°31'S 62°38'W | April 2002     | CNC 678  |
| <i>A. cajennense s. s.</i> | 9  | 3  | <i>S. caffer</i>       | São Francisco do Guaporé  | Rondônia    | 12°3'S 63°34'W  | September 2011 | CNC 2618 |
| <i>A. cajennense s. s.</i> |    | 3  | free living            | Vilhena                   | Rondônia    | 12°44'S 60°8'E  | March 2002     | CNC 626  |
| <i>A. cajennense s. s.</i> |    | 1  | <i>T. tetradactyla</i> | Aragominas                | Tocantins   | 7°9'S 48°31'W   | April 2013     | CNC 2571 |
| <i>A. cajennense s. s.</i> | 1  | 1  | <i>D. novemcinctus</i> | Lagoa da Confusão         | Tocantins   | 10°47'S 49°37'W | April 2013     | CNC 2570 |
| <i>A. cajennense s. s.</i> |    | 19 | <i>M. tridactyla</i>   | Lagoa da Confusão         | Tocantins   | 10°47'S 49°37'W | May 2013       | CNC 2573 |
| <i>A. cajennense s. s.</i> | 2  | 2  | <i>B. taurus</i>       | Pium                      | Tocantins   | 10°26'S 49°10'W | August 2009    | CNC 1797 |
| <i>A. cajennense s. s.</i> |    | 1  | <i>C. familiaris</i>   | Pium                      | Tocantins   | 10°26'S 49°10'W | August 2009    | CNC 1800 |
| <i>A. cajennense s. s.</i> | 2  | 3  | <i>E. caballus</i>     | Pium                      | Tocantins   | 10°26'S 49°10'W | August 2009    | CNC 1794 |
| <i>A. cajennense s. s.</i> | 1  | 1  | free living            | Pium                      | Tocantins   | 10°26'S 49°10'W | August 2009    | CNC 2625 |
| <i>A. cajennense s. s.</i> | 4  | 1  | free living            | Presidente Kennedy        | Tocantins   | 8°32'S 48°30'W  | November 2012  | CNC 2340 |
| <i>A. cajennense s. s.</i> | 7  | 1  | <i>E. asinus</i>       | Chapadinha                | Maranhão    | 3°44'S 43°21'W  | January 2012   | CNC 2635 |
| <i>A. cajennense s. s.</i> | 14 | 17 | <i>E. caballus</i>     | Chapadinha                | Maranhão    | 3°44'S 43°21'W  | January 2012   | CNC 2636 |
| <i>A. cajennense s. s.</i> | 1  | 1  | <i>E. caballus</i>     | Milagres do Maranhão      | Maranhão    | 3°34'S 42°36'W  | February 2013  | CNC 2637 |
| <i>A. cajennense s. s.</i> | 1  | 1  | <i>E. caballus</i>     | Peri Mirim                | Maranhão    | 2°34'S 44°51'W  | August 2013    | CNC 2638 |
| <i>A. cajennense s. s.</i> |    | 1  | <i>E. caballus</i>     | São Bento                 | Maranhão    | 2°41'S 44°49'W  | August 2011    | CNC 2639 |
| <i>A. cajennense s. s.</i> |    | 1  | <i>E. caballus</i>     | São Bernardo              | Maranhão    | 3°21'S 42°25'W  | February 2013  | CNC 2640 |
| <i>A. cajennense s. s.</i> |    | 1  | <i>H. sapiens</i>      | Urbano Santos             | Maranhão    | 3°12'S 43°24'W  | August 2011    | CNC 2641 |
| <i>A. cajennense s. s.</i> | 2  | 2  | <i>S. scofra</i>       | Viana                     | Maranhão    | 3°13'S 45°0'W   | August 2013    | CNC 2642 |
| <i>A. cajennense s. s.</i> | 11 | 34 | <i>T. terrestris</i>   | Alta Floresta             | Mato Grosso | 9°52'S 56°5'W   | December 2013  | CNC 2582 |
| <i>A. cajennense s. s.</i> | 2  | 2  | <i>E. caballus</i>     | Confresa                  | Mato Grosso | 10°38'S 51°34'W | April 2011     | CNC 2645 |
| <i>A. cajennense s. s.</i> | 1  | 1  | <i>T. terrestris</i>   | Jauru                     | Mato Grosso | 15°20'S 58°51'W | January 2011   | CNC 2364 |
| <i>A. cajennense s. s.</i> | 20 | 13 | <i>H. hydrochaeris</i> | Lucas do Rio Verde        | Mato Grosso | 13°3'S 55°54'W  | November 2013  | CNC 2544 |
| <i>A. cajennense s. s.</i> |    | 2  | <i>P. onca</i>         | Lucas do Rio Verde        | Mato Grosso | 13°3'S 55°54'W  | April 2011     | CNC 1924 |
| <i>A. cajennense s. s.</i> |    | 1  | <i>E. caballus</i>     | São Félix do Araguaia     | Mato Grosso | 11°37'S 50°40'W | May 2008       | CNC 1124 |
| <i>A. cajennense s. s.</i> | 1  | 4  | <i>H. hydrochaeris</i> | Sinop                     | Mato Grosso | 11°50'S 55°38'W | July 2012      | CNC 2222 |
| <i>A. cajennense s. s.</i> | 1  | 3  | <i>P. tajacu</i>       | Sinop                     | Mato Grosso | 11°50'S 55°38'W | October 2012   | CNC 2271 |
| <i>A. cajennense s. s.</i> |    | 1  | <i>M. tridactyla</i>   | Araguaína                 | Tocantins   | 7°11'S 48°12'W  | April 2013     | CNC 2574 |
| <i>A. cajennense s. s.</i> |    | 5  | <i>B. taurus</i>       | Caseara                   | Tocantins   | 9°16'S 49°57'W  | May 2009       | CNC 1707 |
| <i>A. cajennense s. s.</i> |    | 1  | <i>B. taurus</i>       | Goiatins                  | Tocantins   | 7°42'S 47°18'W  | September 2007 | CNC 1062 |

|                             |    |    |                        |                           |            |                 |                |          |
|-----------------------------|----|----|------------------------|---------------------------|------------|-----------------|----------------|----------|
| <i>A. cajennense s. s.</i>  |    | 4  | <i>M. tridactyla</i>   | Gurupi                    | Tocantins  | 11°43'S 49°4'W  | November 2012  | CNC 2328 |
| <i>A. cajennense s. s.*</i> | 14 | 6  | free living            | Governador Jorge Teixeira | Rondônia   | 10°31'S 62°38'W | October 2002   | CNC 599  |
| <i>A. cajennense s. s.*</i> |    | 14 | <i>C. familiaris</i>   | Cristalândia              | Tocantins  | 10°36'S 49°11'W | August 2011    | CNC 2619 |
| <i>A. cajennense s. s.*</i> | 2  | 1  | <i>E. caballus</i>     | Cristalândia              | Tocantins  | 10°36'S 49°11'W | August 2011    | CNC 2620 |
| <i>A. cajennense s. s.*</i> |    | 1  | <i>B. taurus</i>       | Lagoa da Confusão         | Tocantins  | 10°47'S 49°37'W | September 2011 | CNC 2621 |
| <i>A. cajennense s. s.*</i> |    | 2  | <i>C. familiaris</i>   | Lagoa da Confusão         | Tocantins  | 10°47'S 49°37'W | September 2011 | CNC 2622 |
| <i>A. cajennense s. s.*</i> |    | 2  | <i>B. taurus</i>       | Pium                      | Tocantins  | 10°26'S 49°10'W | August 2011    | CNC 2623 |
| <i>A. cajennense s. s.*</i> |    | 2  | <i>E. asinus</i>       | Pium                      | Tocantins  | 10°26'S 49°10'W | August 2011    | CNC 2624 |
| <i>A. cajennense s. s.*</i> | 1  | 1  | <i>C. familiaris</i>   | Barreirinhas              | Maranhão   | 2°44'S 42°49'W  | August 2011    | CNC 2632 |
| <i>A. sculptum</i>          |    | 6  | <i>M. tridactyla</i>   | Araguaína                 | Tocantins  | 7°11'S 48°12'W  | April 2013     | CNC 2574 |
| <i>A. sculptum</i>          | 1  | 1  | <i>T. tetradactyla</i> | Araguaína                 | Tocantins  | 7°11'S 48°12'W  | April 2013     | CNC 2507 |
| <i>A. sculptum</i>          |    | 3  | <i>M. tridactyla</i>   | Lagoa da Confusão         | Tocantins  | 10°47'S 49°37'W | May 2013       | CNC 2573 |
| <i>A. sculptum</i>          | 2  | 12 | <i>H. hydrochaeris</i> | Palmas                    | Tocantins  | 10°11'S 48°20'W | January 20013  | CNC 2445 |
| <i>A. sculptum</i>          |    | 1  | <i>E. asinus</i>       | Pium                      | Tocantins  | 10°26'S 49°10'W | August 2011    | CNC 2624 |
| <i>A. sculptum</i>          | 5  | 7  | free living            | Tocantinópolis            | Tocantins  | 6°19'S 47°24'W  | June 2011      | CNC 2626 |
| <i>A. sculptum</i>          | 5  | 4  | <i>E. caballus</i>     | Campo Formoso             | Bahia      | 10°30'S 40°19'W | August 2012    | CNC 2627 |
| <i>A. sculptum</i>          | 12 | 32 | <i>E. caballus</i>     | Teolândia                 | Bahia      | 13°36'S 39°29'W | October 2006   | CNC 2629 |
| <i>A. sculptum</i>          | 1  | 1  | <i>E. caballus</i>     | Açailândia                | Maranhão   | 4°56'S 47°30'W  | August 2013    | CNC 2630 |
| <i>A. sculptum</i>          | 3  | 1  | <i>E. caballus</i>     | Campestre do Maranhão     | Maranhão   | 6°10'S 47°21'W  | January 2012   | CNC 2633 |
| <i>A. sculptum</i>          | 1  | 2  | <i>C. familiaris</i>   | Chapadinha                | Maranhão   | 3°44'S 43°21'W  | February 2010  | CNC 2135 |
| <i>A. sculptum</i>          | 1  | 1  | <i>C. familiaris</i>   | Chapadinha                | Maranhão   | 3°44'S 43°21'W  | March 2010     | CNC 2634 |
| <i>A. sculptum</i>          | 13 | 5  | <i>E. caballus</i>     | Amaraji                   | Pernambuco | 8°22'S 35°27'W  | November 2007  | CNC 1314 |
| <i>A. sculptum</i>          | 1  | 1  | <i>H. sapiens</i>      | Gilbués                   | Piauí      | 9°49'S 45°20'W  | January 2005   | CNC 889  |
| <i>A. sculptum</i>          | 1  | 3  | <i>H. sapiens</i>      | Gilbués                   | Piauí      | 9°49'S 45°20'W  | November 2009  | CNC 1496 |
| <i>A. sculptum</i>          | 5  | 5  | <i>E. asinus</i>       | José de Freitas           | Piauí      | 4°45'S 42°34'W  | January 2011   | CNC 2643 |
| <i>A. sculptum</i>          |    | 2  | <i>C. familiaris</i>   | Cumari                    | Goiás      | 18°15'S 48°9'W  | April 2013     | CNC 2438 |
| <i>A. sculptum</i>          | 7  | 1  | <i>E. caballus</i>     | Cumari                    | Goiás      | 18°15'S 48°9'W  | January 2012   | CNC 2214 |
| <i>A. sculptum</i>          | 6  | 8  | <i>E. caballus</i>     | Cumari                    | Goiás      | 18°15'S 48°9'W  | June 2011      | CNC 2644 |
| <i>A. sculptum</i>          | 2  | 2  | <i>H. sapiens</i>      | Cumari                    | Goiás      | 18°15'S 48°9'W  | February 2012  | CNC 2213 |
| <i>A. sculptum</i>          |    | 1  | <i>C. brachyurus</i>   | Mineiros                  | Goiás      | 17°34'S 52°33'W | October 1999   | CNC 312  |
| <i>A. sculptum</i>          |    | 1  | <i>C. brachyurus</i>   | Mineiros                  | Goiás      | 17°34'S 52°33'W | January 2006   | CNC 1696 |
| <i>A. sculptum</i>          |    | 2  | <i>M. tridactyla</i>   | Mineiros                  | Goiás      | 17°34'S 52°33'W | November 1999  | CNC 259  |
| <i>A. sculptum</i>          |    | 2  | <i>P. onca</i>         | Mineiros                  | Goiás      | 17°34'S 52°33'W | April 2000     | CNC 313  |
| <i>A. sculptum</i>          | 4  | 5  | <i>P. onca</i>         | Mineiros                  | Goiás      | 17°34'S 52°33'W | July 2002      | CNC 767  |
| <i>A. sculptum</i>          | 1  | 7  | <i>P. onca</i>         | Mineiros                  | Goiás      | 17°34'S 52°33'W | January 2007   | CNC 1691 |
| <i>A. sculptum</i>          |    | 1  | <i>P. onca</i>         | Mineiros                  | Goiás      | 17°34'S 52°33'W | November 2008  | CNC 1699 |
| <i>A. sculptum</i>          | 2  | 7  | <i>P. tajacu</i>       | Mineiros                  | Goiás      | 17°34'S 52°33'W | April 2002     | CNC 768  |
| <i>A. sculptum</i>          | 2  | 1  | <i>P. maximus</i>      | Mineiros                  | Goiás      | 17°34'S 52°33'W | January 2005   | CNC 1681 |
| <i>A. sculptum</i>          |    | 6  | <i>T. terrestris</i>   | Mineiros                  | Goiás      | 17°34'S 52°33'W | April 2000     | CNC 315  |

|                    |    |    |                       |                       |                    |                 |                |          |
|--------------------|----|----|-----------------------|-----------------------|--------------------|-----------------|----------------|----------|
| <i>A. sculptum</i> | 45 | 28 | <i>T. terrestris</i>  | Mineiros              | Goiás              | 17°34'S 52°33'W | June 2002      | CNC 776  |
| <i>A. sculptum</i> | 46 | 40 | <i>T. pecari</i>      | Mineiros              | Goiás              | 17°34'S 52°33'W | June 2001      | CNC 769  |
| <i>A. sculptum</i> | 58 | 53 | <i>T. pecari</i>      | Mineiros              | Goiás              | 17°34'S 52°33'W | November 2001  | CNC 770  |
| <i>A. sculptum</i> | 18 | 39 | <i>T. pecari</i>      | Mineiros              | Goiás              | 17°34'S 52°33'W | January 2002   | CNC 772  |
| <i>A. sculptum</i> | 17 | 8  | <i>T. pecari</i>      | Mineiros              | Goiás              | 17°34'S 52°33'W | March 2003     | CNC 821  |
| <i>A. sculptum</i> |    | 1  | <i>T. pecari</i>      | Mineiros              | Goiás              | 17°34'S 52°33'W | July 2004      | CNC 1655 |
| <i>A. sculptum</i> | 3  | 3  | free living           | Mineiros              | Goiás              | 17°34'S 52°33'W | November 2000  | CNC 298  |
| <i>A. sculptum</i> | 9  | 15 | <i>C. thous</i>       | Barão de Melgaço      | Mato Grosso        | 16°11'S 55°58'W | September 2003 | CNC 802  |
| <i>A. sculptum</i> | 1  | 3  | <i>Puma concolor</i>  | Barão de Melgaço      | Mato Grosso        | 16°11'S 55°58'W | January 2002   | CNC 598  |
| <i>A. sculptum</i> |    | 3  | <i>Puma concolor</i>  | Barão de Melgaço      | Mato Grosso        | 16°11'S 55°58'W | January 2003   | CNC 760  |
| <i>A. sculptum</i> | 5  | 4  | <i>T. terrestris</i>  | Chapada dos Guimarães | Mato Grosso        | 15°27'S 55°45'W | June 2001      | CNC 554  |
| <i>A. sculptum</i> |    | 5  | <i>M. gouazoubira</i> | Cuiabá                | Mato Grosso        | 15°35'S 56°5'W  | July 2012      | CNC 2275 |
| <i>A. sculptum</i> | 1  | 1  | <i>H. sapiens</i>     | Jauru                 | Mato Grosso        | 15°20'S 58°51'W | March 2001     | CNC 433  |
| <i>A. sculptum</i> |    | 7  | <i>P. onca</i>        | Lucas do Rio Verde    | Mato Grosso        | 13°3'S 55°54'W  | April 2011     | CNC 1924 |
| <i>A. sculptum</i> | 1  | 1  | <i>H. sapiens</i>     | Nobres                | Mato Grosso        | 14°43'S 56°19'W | June 2012      | CNC 2646 |
| <i>A. sculptum</i> | 5  | 2  | free living           | Nobres                | Mato Grosso        | 14°43'S 56°19'W | June 2012      | CNC 2314 |
| <i>A. sculptum</i> | 1  | 21 | free living           | Nobres                | Mato Grosso        | 14°43'S 56°19'W | June 2012      | CNC 2647 |
| <i>A. sculptum</i> | 2  | 3  | <i>S. venaticus</i>   | Nova Xavantina        | Mato Grosso        | 14°40'S 52°21'W | June 2012      | CNC 2212 |
| <i>A. sculptum</i> |    | 1  | <i>C. familiaris</i>  | Poconé                | Mato Grosso        | 16°15'S 56°37'W | April 2002     | CNC 648  |
| <i>A. sculptum</i> | 2  | 12 | <i>E. caballus</i>    | Poconé                | Mato Grosso        | 16°15'S 56°37'W | April 2002     | CNC 647  |
| <i>A. sculptum</i> | 1  | 6  | <i>E. caballus</i>    | Poconé                | Mato Grosso        | 16°15'S 56°37'W | October 2012   | CNC 2315 |
| <i>A. sculptum</i> | 13 | 22 | <i>E. caballus</i>    | Poconé                | Mato Grosso        | 16°15'S 56°37'W | July 2011      | CNC 2648 |
| <i>A. sculptum</i> | 8  | 12 | <i>H. sapiens</i>     | Poconé                | Mato Grosso        | 16°15'S 56°37'W | April 2002     | CNC 649  |
| <i>A. sculptum</i> |    | 1  | <i>P. onca</i>        | Poconé                | Mato Grosso        | 16°15'S 56°37'W | August 1996    | CNC 144  |
| <i>A. sculptum</i> | 1  | 2  | <i>P. onca</i>        | Poconé                | Mato Grosso        | 16°15'S 56°37'W | November 2008  | CNC 1358 |
| <i>A. sculptum</i> |    | 1  | <i>P. onca</i>        | Poconé                | Mato Grosso        | 16°15'S 56°37'W | June 2011      | CNC 1921 |
| <i>A. sculptum</i> | 2  | 1  | <i>P. onca</i>        | Poconé                | Mato Grosso        | 16°15'S 56°37'W | June 2013      | CNC 2495 |
| <i>A. sculptum</i> |    | 1  | <i>P. onca</i>        | Anaurilândia          | Mato Grosso do Sul | 22°11'S 52°43'W | March 2001     | CNC 469  |
| <i>A. sculptum</i> | 1  | 3  | <i>P. onca</i>        | Anaurilândia          | Mato Grosso do Sul | 22°11'S 52°43'W | February 2002  | CNC 833  |
| <i>A. sculptum</i> | 3  | 1  | <i>P. tajacu</i>      | Anaurilândia          | Mato Grosso do Sul | 22°11'S 52°43'W | August 2000    | CNC 326  |
| <i>A. sculptum</i> | 11 | 28 | <i>T. terrestris</i>  | Aquidauana            | Mato Grosso do Sul | 20°28'S 55°47'W | September 2008 | CNC 1146 |
| <i>A. sculptum</i> | 8  | 21 | <i>T. terrestris</i>  | Aquidauana            | Mato Grosso do Sul | 20°28'S 55°47'W | no data        | CNC 1424 |
| <i>A. sculptum</i> | 14 | 56 | <i>T. terrestris</i>  | Aquidauana            | Mato Grosso do Sul | 20°28'S 55°47'W | July 2009      | CNC 1456 |
| <i>A. sculptum</i> |    | 17 | <i>T. terrestris</i>  | Aquidauana            | Mato Grosso do Sul | 20°28'S 55°47'W | August 2010    | CNC 1651 |
| <i>A. sculptum</i> | 4  | 18 | <i>T. terrestris</i>  | Aquidauana            | Mato Grosso do Sul | 20°28'S 55°47'W | May 2011       | CNC 1915 |
| <i>A. sculptum</i> | 8  | 14 | <i>T. terrestris</i>  | Aquidauana            | Mato Grosso do Sul | 20°28'S 55°47'W | August 2011    | CNC 1937 |
| <i>A. sculptum</i> | 6  | 24 | <i>T. terrestris</i>  | Aquidauana            | Mato Grosso do Sul | 20°28'S 55°47'W | December 2011  | CNC 2093 |
| <i>A. sculptum</i> |    | 33 | <i>T. terrestris</i>  | Aquidauana            | Mato Grosso do Sul | 20°28'S 55°47'W | May 2012       | CNC 2181 |
| <i>A. sculptum</i> | 23 | 89 | <i>T. terrestris</i>  | Aquidauana            | Mato Grosso do Sul | 20°28'S 55°47'W | November 2012  | CNC 2304 |

|                    |    |    |                        |              |                    |                 |                |          |
|--------------------|----|----|------------------------|--------------|--------------------|-----------------|----------------|----------|
| <i>A. sculptum</i> |    | 36 | <i>T. terrestris</i>   | Aquidauana   | Mato Grosso do Sul | 20°28'S 55°47'W | May 2013       | CNC 2478 |
| <i>A. sculptum</i> | 6  | 30 | <i>T. terrestris</i>   | Aquidauana   | Mato Grosso do Sul | 20°28'S 55°47'W | July 2013      | CNC 2512 |
| <i>A. sculptum</i> |    | 13 | <i>T. terrestris</i>   | Aquidauana   | Mato Grosso do Sul | 20°28'S 55°47'W | December 2013  | CNC 2583 |
| <i>A. sculptum</i> | 1  | 1  | <i>B. dichotomus</i>   | Bataguassu   | Mato Grosso do Sul | 21°42'S 52°25'W | February 2001  | CNC 420  |
| <i>A. sculptum</i> |    | 1  | <i>B. dichotomus</i>   | Bataguassu   | Mato Grosso do Sul | 21°42'S 52°25'W | February 2001  | CNC 434  |
| <i>A. sculptum</i> |    | 1  | <i>B. dichotomus</i>   | Bataguassu   | Mato Grosso do Sul | 21°42'S 52°25'W | no data        | CNC 435  |
| <i>A. sculptum</i> | 2  | 2  | <i>M. tridactyla</i>   | Bataguassu   | Mato Grosso do Sul | 21°42'S 52°25'W | August 2000    | CNC 341  |
| <i>A. sculptum</i> | 2  | 3  | <i>M. tridactyla</i>   | Brasilândia  | Mato Grosso do Sul | 21°15'S 52°2'W  | August 2000    | CNC 339  |
| <i>A. sculptum</i> |    | 2  | <i>C. brachyurus</i>   | Bonito       | Mato Grosso do Sul | 21°7'S 56°28'W  | March 2002     | CNC 623  |
| <i>A. sculptum</i> |    | 1  | <i>H. sapiens</i>      | Bonito       | Mato Grosso do Sul | 21°7'S 56°28'W  | April 2005     | CNC 897  |
| <i>A. sculptum</i> | 1  | 1  | <i>T. terrestris</i>   | Bonito       | Mato Grosso do Sul | 21°7'S 56°28'W  | March 2002     | CNC 625  |
| <i>A. sculptum</i> |    | 8  | <i>T. terrestris</i>   | Bonito       | Mato Grosso do Sul | 21°7'S 56°28'W  | March 2002     | CNC 658  |
| <i>A. sculptum</i> | 3  | 3  | <i>E. caballus</i>     | Campo Grande | Mato Grosso do Sul | 20°26'S 54°38'W | December 2012  | CNC 2322 |
| <i>A. sculptum</i> |    | 3  | <i>E. caballus</i>     | Corumbá      | Mato Grosso do Sul | 19°0'S 57°39'W  | January 2009   | CNC 1364 |
| <i>A. sculptum</i> | 17 | 8  | <i>E. caballus</i>     | Corumbá      | Mato Grosso do Sul | 19°0'S 57°39'W  | April 2009     | CNC 1415 |
| <i>A. sculptum</i> | 2  | 2  | <i>E. caballus</i>     | Corumbá      | Mato Grosso do Sul | 19°0'S 57°39'W  | May 2009       | CNC 1425 |
| <i>A. sculptum</i> | 5  | 10 | <i>H. sapiens</i>      | Corumbá      | Mato Grosso do Sul | 19°0'S 57°39'W  | January 2009   | CNC 1365 |
| <i>A. sculptum</i> | 1  | 3  | <i>H. sapiens</i>      | Corumbá      | Mato Grosso do Sul | 19°0'S 57°39'W  | May 2008       | CNC 1404 |
| <i>A. sculptum</i> |    | 2  | <i>H. sapiens</i>      | Corumbá      | Mato Grosso do Sul | 19°0'S 57°39'W  | June 2009      | CNC 1430 |
| <i>A. sculptum</i> |    | 1  | <i>H. hydrochaeris</i> | Corumbá      | Mato Grosso do Sul | 19°0'S 57°39'W  | September 1997 | CNC 103  |
| <i>A. sculptum</i> | 6  | 3  | <i>H. hydrochaeris</i> | Corumbá      | Mato Grosso do Sul | 19°0'S 57°39'W  | August 2008    | CNC 1360 |
| <i>A. sculptum</i> | 11 | 38 | <i>P. onca</i>         | Corumbá      | Mato Grosso do Sul | 19°0'S 57°39'W  | June 2011      | CNC 2073 |
| <i>A. sculptum</i> | 2  | 2  | <i>P. onca</i>         | Corumbá      | Mato Grosso do Sul | 19°0'S 57°39'W  | October 2012   | CNC 2302 |
| <i>A. sculptum</i> | 8  | 5  | <i>Sus scrofa</i>      | Corumbá      | Mato Grosso do Sul | 19°0'S 57°39'W  | August 2010    | CNC 1643 |
| <i>A. sculptum</i> | 27 | 11 | <i>Sus scrofa</i>      | Corumbá      | Mato Grosso do Sul | 19°0'S 57°39'W  | July 2011      | CNC 1949 |
| <i>A. sculptum</i> | 24 | 10 | <i>Sus scrofa</i>      | Corumbá      | Mato Grosso do Sul | 19°0'S 57°39'W  | August 2010    | CNC 2649 |
| <i>A. sculptum</i> | 4  | 1  | <i>T. pecari</i>       | Corumbá      | Mato Grosso do Sul | 19°0'S 57°39'W  | September 1997 | CNC 94   |
| <i>A. sculptum</i> | 3  | 3  | <i>T. pecari</i>       | Corumbá      | Mato Grosso do Sul | 19°0'S 57°39'W  | September 1997 | CNC 96   |
| <i>A. sculptum</i> | 1  | 2  | <i>T. pecari</i>       | Corumbá      | Mato Grosso do Sul | 19°0'S 57°39'W  | September 1997 | CNC 97   |
| <i>A. sculptum</i> | 8  | 2  | <i>T. pecari</i>       | Corumbá      | Mato Grosso do Sul | 19°0'S 57°39'W  | September 1997 | CNC 98   |
| <i>A. sculptum</i> | 9  | 7  | <i>T. pecari</i>       | Corumbá      | Mato Grosso do Sul | 19°0'S 57°39'W  | July 2011      | CNC 1947 |
| <i>A. sculptum</i> | 16 | 21 | free living            | Corumbá      | Mato Grosso do Sul | 19°0'S 57°39'W  | July 2011      | CNC 1950 |
| <i>A. sculptum</i> |    | 1  | <i>C. unicinctus</i>   | Miranda      | Mato Grosso do Sul | 20°14'S 56°22'W | December 2012  | CNC 2377 |
| <i>A. sculptum</i> |    | 1  | <i>E. sexcinctus</i>   | Miranda      | Mato Grosso do Sul | 20°14'S 56°22'W | July 2012      | CNC 2378 |
| <i>A. sculptum</i> |    | 2  | <i>E. sexcinctus</i>   | Miranda      | Mato Grosso do Sul | 20°14'S 56°22'W | June 2013      | CNC 2498 |
| <i>A. sculptum</i> |    | 1  | <i>E. sexcinctus</i>   | Miranda      | Mato Grosso do Sul | 20°14'S 56°22'W | December 2013  | CNC 2602 |
| <i>A. sculptum</i> |    | 1  | <i>H. sapiens</i>      | Miranda      | Mato Grosso do Sul | 20°14'S 56°22'W | June 2012      | CNC 2215 |
| <i>A. sculptum</i> | 2  | 5  | <i>M. tridactyla</i>   | Miranda      | Mato Grosso do Sul | 20°14'S 56°22'W | July 2013      | CNC 2511 |
| <i>A. sculptum</i> | 11 | 7  | <i>M. tridactyla</i>   | Miranda      | Mato Grosso do Sul | 20°14'S 56°22'W | December 2013  | CNC 2604 |

|                    |    |    |                        |                      |                    |                 |                |          |
|--------------------|----|----|------------------------|----------------------|--------------------|-----------------|----------------|----------|
| <i>A. sculptum</i> | 1  | 4  | <i>P. onca</i>         | Miranda              | Mato Grosso do Sul | 20°14'S 56°22'W | October 2003   | CNC 1675 |
| <i>A. sculptum</i> | 1  | 2  | <i>P. onca</i>         | Miranda              | Mato Grosso do Sul | 20°14'S 56°22'W | December 2014  | CNC 1678 |
| <i>A. sculptum</i> | 15 | 45 | <i>P. onca</i>         | Miranda              | Mato Grosso do Sul | 20°14'S 56°22'W | December 2015  | CNC 1693 |
| <i>A. sculptum</i> | 10 | 26 | <i>P. onca</i>         | Miranda              | Mato Grosso do Sul | 20°14'S 56°22'W | January 2007   | CNC 1702 |
| <i>A. sculptum</i> | 1  | 1  | <i>P. onca</i>         | Miranda              | Mato Grosso do Sul | 20°14'S 56°22'W | October 2011   | CNC 2173 |
| <i>A. sculptum</i> | 4  | 6  | <i>P. onca</i>         | Miranda              | Mato Grosso do Sul | 20°14'S 56°22'W | April 2012     | CNC 2216 |
| <i>A. sculptum</i> | 16 | 20 | <i>P. onca</i>         | Miranda              | Mato Grosso do Sul | 20°14'S 56°22'W | April 2013     | CNC 2452 |
| <i>A. sculptum</i> |    | 1  | <i>P. maximus</i>      | Miranda              | Mato Grosso do Sul | 20°14'S 56°22'W | July 2010      | CNC 1636 |
| <i>A. sculptum</i> | 24 | 19 | <i>P. maximus</i>      | Miranda              | Mato Grosso do Sul | 20°14'S 56°22'W | July 2012      | CNC 2379 |
| <i>A. sculptum</i> | 36 | 36 | <i>P. maximus</i>      | Miranda              | Mato Grosso do Sul | 20°14'S 56°22'W | April 2013     | CNC 2465 |
| <i>A. sculptum</i> | 42 | 32 | <i>P. maximus</i>      | Miranda              | Mato Grosso do Sul | 20°14'S 56°22'W | June 2013      | CNC 2499 |
| <i>A. sculptum</i> | 2  | 1  | <i>P. maximus</i>      | Miranda              | Mato Grosso do Sul | 20°14'S 56°22'W | August 2013    | CNC 2516 |
| <i>A. sculptum</i> | 5  | 7  | <i>P. maximus</i>      | Miranda              | Mato Grosso do Sul | 20°14'S 56°22'W | November 2013  | CNC 2546 |
| <i>A. sculptum</i> | 2  | 6  | <i>P. maximus</i>      | Miranda              | Mato Grosso do Sul | 20°14'S 56°22'W | December 2013  | CNC 2603 |
| <i>A. sculptum</i> | 1  | 2  | free living            | Miranda              | Mato Grosso do Sul | 20°14'S 56°22'W | July 2010      | CNC 1645 |
| <i>A. sculptum</i> | 9  | 2  | <i>M. tridactyla</i>   | Nova Alvorada do Sul | Mato Grosso do Sul | 21°27'S 54°23'W | April 2005     | CNC 895  |
| <i>A. sculptum</i> | 4  | 4  | <i>T. terrestris</i>   | Nova Alvorada do Sul | Mato Grosso do Sul | 21°27'S 54°23'W | August 2013    | CNC 2513 |
| <i>A. sculptum</i> | 6  | 3  | <i>M. tridactyla</i>   | Santa Rita do Pardo  | Mato Grosso do Sul | 21°18'S 52°49'W | July 2000      | CNC 337  |
| <i>A. sculptum</i> | 3  | 1  | <i>M. tridactyla</i>   | Santa Rita do Pardo  | Mato Grosso do Sul | 21°18'S 52°49'W | August 2000    | CNC 347  |
| <i>A. sculptum</i> |    | 1  | <i>T. tetradactyla</i> | Santa Rita do Pardo  | Mato Grosso do Sul | 21°18'S 52°49'W | August 2000    | CNC 352  |
| <i>A. sculptum</i> | 17 | 37 | free living            | Terenos              | Mato Grosso do Sul | 20°26'S 54°51'W | November 2012  | CNC 2372 |
| <i>A. sculptum</i> | 1  | 1  | <i>H. sapiens</i>      | Três Lagoas          | Mato Grosso do Sul | 20°45'S 51°40'W | March 1999     | CNC 215  |
| <i>A. sculptum</i> | 3  | 2  | free living            | Colatina             | Espírito Santo     | 19°32'S 40°37'W | October 2007   | CNC 1063 |
| <i>A. sculptum</i> | 5  | 7  | free living            | Nova Venécia         | Espírito Santo     | 18°42'S 40°24'W | May 2007       | CNC 1045 |
| <i>A. sculptum</i> | 4  |    | <i>E. caballus</i>     | Pinheiros            | Espírito Santo     | 18°24'S 40°13'W | July 2011      | CNC 2645 |
| <i>A. sculptum</i> |    | 7  | <i>E. caballus</i>     | Araguari             | Minas Gerais       | 18°38'S 48°11'W | May 2011       | CNC 1909 |
| <i>A. sculptum</i> | 5  | 25 | <i>E. caballus</i>     | Araguari             | Minas Gerais       | 18°38'S 48°11'W | May 2011       | CNC 2650 |
| <i>A. sculptum</i> | 6  | 5  | <i>C. brachyurus</i>   | Chapada Gaúcha       | Minas Gerais       | 15°18'S 45°37'W | September 2009 | CNC 1455 |
| <i>A. sculptum</i> | 1  | 3  | <i>H. sapiens</i>      | Chapada Gaúcha       | Minas Gerais       | 15°18'S 45°37'W | December 2007  | CNC 1414 |
| <i>A. sculptum</i> |    | 1  | <i>H. sapiens</i>      | Chapada Gaúcha       | Minas Gerais       | 15°18'S 45°37'W | May 2012       | CNC 2175 |
| <i>A. sculptum</i> |    | 2  | <i>P. onca</i>         | Chapada Gaúcha       | Minas Gerais       | 15°18'S 45°37'W | August 2011    | CNC 1956 |
| <i>A. sculptum</i> | 2  | 1  | free living            | Chapada Gaúcha       | Minas Gerais       | 15°18'S 45°37'W | January 2009   | CNC 1441 |
| <i>A. sculptum</i> | 1  | 3  | free living            | Chapada Gaúcha       | Minas Gerais       | 15°18'S 45°37'W | May 2012       | CNC 2176 |
| <i>A. sculptum</i> | 5  | 3  | free living            | Chapada Gaúcha       | Minas Gerais       | 15°18'S 45°37'W | May 2012       | CNC 2177 |
| <i>A. sculptum</i> | 6  | 21 | free living            | Chapada Gaúcha       | Minas Gerais       | 15°18'S 45°37'W | May 2012       | CNC 2179 |
| <i>A. sculptum</i> |    | 1  | free living            | Doresópolis          | Minas Gerais       | 20°17'S 45°54'W | August 2008    | CNC 1341 |
| <i>A. sculptum</i> | 4  | 1  | <i>H. hydrochaeris</i> | Guarda-Mor           | Minas Gerais       | 17°46'S 47°5'W  | August 2013    | CNC 2519 |
| <i>A. sculptum</i> |    | 1  | <i>C. familiaris</i>   | Itabira              | Minas Gerais       | 19°37'S 43°13'W | December 2010  | CNC 1780 |
| <i>A. sculptum</i> | 30 | 20 | <i>E. caballus</i>     | Itabira              | Minas Gerais       | 19°37'S 43°13'W | January 2011   | CNC 2651 |

|                    |     |     |                        |                      |                |                 |                |          |
|--------------------|-----|-----|------------------------|----------------------|----------------|-----------------|----------------|----------|
| <i>A. sculptum</i> | 2   | 4   | <i>H. sapiens</i>      | Marliéria            | Minas Gerais   | 19°42'S 42°43'W | September 2012 | CNC 2266 |
| <i>A. sculptum</i> | 1   | 2   | <i>M. tridactyla</i>   | Monte Carmelo        | Minas Gerais   | 18°43'S 47°29'W | November 2013  | CNC 2543 |
| <i>A. sculptum</i> |     | 1   | <i>D. azarae</i>       | Morada Nova de Minas | Minas Gerais   | 18°36'S 45°21'W | May 2009       | CNC 2083 |
| <i>A. sculptum</i> | 21  | 11  | free living            | Morada Nova de Minas | Minas Gerais   | 18°36'S 45°21'W | May 2009       | CNC 1885 |
| <i>A. sculptum</i> | 2   | 1   | free living            | Pedra Bonita         | Minas Gerais   | 20°31'S 42°19'W | April 2013     | CNC 2467 |
| <i>A. sculptum</i> | 1   | 2   | <i>M. tridactyla</i>   | Pratinha             | Minas Gerais   | 19°45'S 46°22'W | May 2008       | CNC 1114 |
| <i>A. sculptum</i> | 147 | 110 | <i>H. hydrochaeris</i> | Santana do Riacho    | Minas Gerais   | 19°10'S 43°42'W | September 2010 | CNC 1734 |
| <i>A. sculptum</i> | 3   | 1   | <i>B. taurus</i>       | São Roque de Minas   | Minas Gerais   | 20°14'S 46°21'W | April 2007     | CNC 1018 |
| <i>A. sculptum</i> | 3   | 3   | <i>C. brachyurus</i>   | São Roque de Minas   | Minas Gerais   | 20°14'S 46°21'W | September 2007 | CNC 1362 |
| <i>A. sculptum</i> | 7   | 16  | <i>S. scrofa</i>       | São Roque de Minas   | Minas Gerais   | 20°14'S 46°21'W | March 2008     | CNC 1096 |
| <i>A. sculptum</i> | 25  | 36  | free living            | São Roque de Minas   | Minas Gerais   | 20°14'S 46°21'W | April 2007     | CNC 1016 |
| <i>A. sculptum</i> | 3   | 10  | free living            | São Roque de Minas   | Minas Gerais   | 20°14'S 46°21'W | August 2007    | CNC 1046 |
| <i>A. sculptum</i> | 4   | 3   | free living            | São Roque de Minas   | Minas Gerais   | 20°14'S 46°21'W | March 2008     | CNC 1099 |
| <i>A. sculptum</i> | 2   | 1   | free living            | São Roque de Minas   | Minas Gerais   | 20°14'S 46°21'W | May 2008       | CNC 1115 |
| <i>A. sculptum</i> | 8   | 8   | free living            | São Roque de Minas   | Minas Gerais   | 20°14'S 46°21'W | June 2007      | CNC 1149 |
| <i>A. sculptum</i> | 14  | 21  | free living            | São Roque de Minas   | Minas Gerais   | 20°14'S 46°21'W | February 2009  | CNC 1417 |
| <i>A. sculptum</i> | 1   | 4   | free living            | São Roque de Minas   | Minas Gerais   | 20°14'S 46°21'W | May 2009       | CNC 1495 |
| <i>A. sculptum</i> | 1   | 4   | free living            | São Roque de Minas   | Minas Gerais   | 20°14'S 46°21'W | September 2011 | CNC 2048 |
| <i>A. sculptum</i> | 3   | 2   | <i>E. caballus</i>     | Tiradentes           | Minas Gerais   | 21°6'S 44°10'W  | January 2008   | CNC 1083 |
| <i>A. sculptum</i> | 6   | 5   | <i>H. sapiens</i>      | Três Marias          | Minas Gerais   | 18°12'S 45°14'W | September 2013 | CNC 2529 |
| <i>A. sculptum</i> | 23  | 39  | free living            | Vargem Bonita        | Minas Gerais   | 20°19'S 46°21'W | March 2008     | CNC 1100 |
| <i>A. sculptum</i> | 10  | 9   | free living            | Vargem Bonita        | Minas Gerais   | 20°19'S 46°21'W | May 2008       | CNC 1116 |
| <i>A. sculptum</i> | 28  | 26  | free living            | Vargem Bonita        | Minas Gerais   | 20°19'S 46°21'W | August 2008    | CNC 1150 |
| <i>A. sculptum</i> | 63  | 123 | free living            | Vargem Bonita        | Minas Gerais   | 20°19'S 46°21'W | February 2009  | CNC 1418 |
| <i>A. sculptum</i> | 32  | 26  | free living            | Vargem Bonita        | Minas Gerais   | 20°19'S 46°21'W | December 2011  | CNC 2652 |
| <i>A. sculptum</i> | 6   | 6   | <i>E. caballus</i>     | Seropédica           | Rio de Janeiro | 22°44'S 43°42'W | May 2011       | CNC 2653 |
| <i>A. sculptum</i> | 2   | 4   | <i>T. tetradactyla</i> | Teresópolis          | Rio de Janeiro | 22°24'S 42°57'W | September 2009 | CNC 1793 |
| <i>A. sculptum</i> | 14  | 22  | free living            | Americana            | São Paulo      | 22°44'S 47°19'W | September 2011 | CNC 1957 |
| <i>A. sculptum</i> | 21  | 20  | free living            | Americana            | São Paulo      | 22°44'S 47°19'W | October 2011   | CNC 2070 |
| <i>A. sculptum</i> | 32  | 39  | free living            | Americana            | São Paulo      | 22°44'S 47°19'W | December 2011  | CNC 2088 |
| <i>A. sculptum</i> | 29  | 64  | free living            | Americana            | São Paulo      | 22°44'S 47°19'W | May 2005       | CNC 2654 |
| <i>A. sculptum</i> | 2   | 8   | <i>H. hydrochaeris</i> | Andradina            | São Paulo      | 20°53'S 51°22'W | September 2005 | CNC 962  |
| <i>A. sculptum</i> |     | 1   | <i>M. tridactyla</i>   | Angatuba             | São Paulo      | 23°29'S 48°24'W | October 2010   | CNC 1739 |
| <i>A. sculptum</i> |     | 1   | <i>C. familiaris</i>   | Araçariguama         | São Paulo      | 23°26'S 47°3'W  | November 1997  | CNC 108  |
| <i>A. sculptum</i> | 1   | 1   | <i>C. familiaris</i>   | Araçariguama         | São Paulo      | 23°26'S 47°3'W  | January 1998   | CNC 116  |
| <i>A. sculptum</i> |     | 1   | <i>H. hydrochaeris</i> | Araçariguama         | São Paulo      | 23°26'S 47°3'W  | July 2013      | CNC 2514 |
| <i>A. sculptum</i> |     | 1   | free living            | Araçariguama         | São Paulo      | 23°26'S 47°3'W  | March 1998     | CNC 129  |
| <i>A. sculptum</i> |     | 1   | <i>S. villosus</i>     | Biritiba Mirim       | São Paulo      | 23°34'S 46°2'W  | March 2005     | CNC 1119 |
| <i>A. sculptum</i> |     | 1   | <i>H. hydrochaeris</i> | Bragança Paulista    | São Paulo      | 22°57'S 46°32'W | October 2003   | CNC 809  |

|                    |     |     |                         |                 |           |                 |                |          |
|--------------------|-----|-----|-------------------------|-----------------|-----------|-----------------|----------------|----------|
| <i>A. sculptum</i> | 2   | 5   | free living             | Campinas        | São Paulo | 22°54'S 47°3'W  | March 2009     | CNC 1406 |
| <i>A. sculptum</i> |     | 1   | <i>E. caballus</i>      | Franca          | São Paulo | 20°32'S 47°24'W | March 2001     | CNC 520  |
| <i>A. sculptum</i> | 1   | 3   | <i>H. hydrochaeris</i>  | Guarulhos       | São Paulo | 23°27'S 46°31'W | March 2005     | CNC 961  |
| <i>A. sculptum</i> | 18  | 6   | <i>E. caballus</i>      | Indaiatuba      | São Paulo | 23°5'S 47°13'W  | November 2003  | CNC 808  |
| <i>A. sculptum</i> |     | 1   | <i>M. tridactyla</i>    | Itapetininga    | São Paulo | 23°35'S 48°3'W  | January 2008   | CNC 1086 |
| <i>A. sculptum</i> | 12  | 23  | <i>H. hydrochaeris</i>  | Itu             | São Paulo | 23°15'S 47°17'W | September 2008 | CNC 1537 |
| <i>A. sculptum</i> |     | 1   | <i>H. hydrochaeris</i>  | Itu             | São Paulo | 23°15'S 47°17'W | November 2010  | CNC 1749 |
| <i>A. sculptum</i> | 3   | 6   | <i>M. tridactyla</i>    | Itu             | São Paulo | 23°15'S 47°17'W | July 2008      | CNC 1132 |
| <i>A. sculptum</i> | 1   | 16  | <i>M. tridactyla</i>    | Itu             | São Paulo | 23°15'S 47°17'W | November 2009  | CNC 1503 |
| <i>A. sculptum</i> | 40  | 46  | free living             | Itu             | São Paulo | 23°15'S 47°17'W | January 2006   | CNC 957  |
| <i>A. sculptum</i> |     | 1   | <i>H. sapiens</i>       | Jarinu          | São Paulo | 23°6'S 46° 43'W | February 2009  | CNC 1368 |
| <i>A. sculptum</i> |     | 1   | <i>Cariama cristata</i> | Jundiaí         | São Paulo | 23°11'S 46°53'W | November 2001  | CNC 687  |
| <i>A. sculptum</i> |     | 1   | <i>H. hydrochaeris</i>  | Jundiaí         | São Paulo | 23°11'S 46°53'W | April 2000     | CNC 692  |
| <i>A. sculptum</i> |     | 6   | <i>E. caballus</i>      | Lorena          | São Paulo | 22°43'S 45°7'W  | January 2013   | CNC 2343 |
| <i>A. sculptum</i> |     | 1   | <i>P. tajacu</i>        | Luís Antônio    | São Paulo | 21°33'S 47°42'W | July 2002      | CNC 738  |
| <i>A. sculptum</i> | 270 | 237 | free living             | Mogi das Cruzes | São Paulo | 23°31'S 46°11'W | October 2005   | CNC 964  |
| <i>A. sculptum</i> | 83  | 65  | free living             | Panorama        | São Paulo | 21°21'S 51°51'W | November 2002  | CNC 747  |
| <i>A. sculptum</i> |     | 1   | <i>B. dichotomus</i>    | Pauliceia       | São Paulo | 21°19'S 51°49'W | April 2001     | CNC 505  |
| <i>A. sculptum</i> | 1   | 8   | <i>E. caballus</i>      | Pauliceia       | São Paulo | 21°19'S 51°49'W | April 2001     | CNC 454  |
| <i>A. sculptum</i> | 1   | 1   | <i>E. caballus</i>      | Pauliceia       | São Paulo | 21°19'S 51°49'W | April 2001     | CNC 513  |
| <i>A. sculptum</i> | 4   | 14  | <i>E. caballus</i>      | Pauliceia       | São Paulo | 21°19'S 51°49'W | January 2002   | CNC 592  |
| <i>A. sculptum</i> |     | 1   | <i>E. caballus</i>      | Pauliceia       | São Paulo | 21°19'S 51°49'W | April 2002     | CNC 641  |
| <i>A. sculptum</i> | 19  | 19  | free living             | Pauliceia       | São Paulo | 21°19'S 51°49'W | July 2001      | CNC 532  |
| <i>A. sculptum</i> | 32  | 41  | free living             | Pauliceia       | São Paulo | 21°19'S 51°49'W | January 2002   | CNC 588  |
| <i>A. sculptum</i> |     | 1   | free living             | Pauliceia       | São Paulo | 21°19'S 51°49'W | January 2002   | CNC 589  |
| <i>A. sculptum</i> | 12  | 6   | free living             | Pauliceia       | São Paulo | 21°19'S 51°49'W | January 2002   | CNC 590  |
| <i>A. sculptum</i> | 14  | 37  | free living             | Pauliceia       | São Paulo | 21°19'S 51°49'W | January 2002   | CNC 591  |
| <i>A. sculptum</i> | 16  | 8   | free living             | Pauliceia       | São Paulo | 21°19'S 51°49'W | April 2002     | CNC 636  |
| <i>A. sculptum</i> | 3   | 7   | free living             | Pauliceia       | São Paulo | 21°19'S 51°49'W | April 2002     | CNC 638  |
| <i>A. sculptum</i> | 16  | 26  | free living             | Pauliceia       | São Paulo | 21°19'S 51°49'W | April 2002     | CNC 639  |
| <i>A. sculptum</i> | 6   | 9   | free living             | Pauliceia       | São Paulo | 21°19'S 51°49'W | April 2002     | CNC 640  |
| <i>A. sculptum</i> | 2   | 4   | free living             | Pauliceia       | São Paulo | 21°19'S 51°49'W | April 2002     | CNC 642  |
| <i>A. sculptum</i> | 5   | 5   | free living             | Pedreira        | São Paulo | 22°44'S 46°54'W | February 2011  | CNC 2655 |
| <i>A. sculptum</i> | 3   | 1   | <i>E. caballus</i>      | Peruíbe         | São Paulo | 24°19'S 46°59'W | February 2011  | CNC 1813 |
| <i>A. sculptum</i> |     | 1   | free living             | Peruíbe         | São Paulo | 24°19'S 46°59'W | November 2010  | CNC 1855 |
| <i>A. sculptum</i> | 5   | 6   | <i>H. hydrochaeris</i>  | Piracicaba      | São Paulo | 22°43'S 47°38'W | March 2001     | CNC 436  |
| <i>A. sculptum</i> | 27  | 18  | <i>H. hydrochaeris</i>  | Piracicaba      | São Paulo | 22°43'S 47°38'W | October 2001   | CNC 566  |
| <i>A. sculptum</i> | 1   | 4   | <i>E. caballus</i>      | Pirassununga    | São Paulo | 21°59'S 47°25'W | May 1997       | CNC 16   |
| <i>A. sculptum</i> | 2   | 8   | <i>E. caballus</i>      | Pirassununga    | São Paulo | 21°59'S 47°25'W | December 2008  | CNC 1809 |



|                    |     |    |                        |                            |           |                 |                |          |
|--------------------|-----|----|------------------------|----------------------------|-----------|-----------------|----------------|----------|
| <i>A. sculptum</i> |     | 1  | free living            | Pirassununga               | São Paulo | 21°59'S 47°25'W | October 2000   | CNC 363  |
| <i>A. sculptum</i> | 3   | 9  | <i>E. caballus</i>     | Presidente Prudente        | São Paulo | 22°7'S 51°23'W  | January 2006   | CNC 1005 |
| <i>A. sculptum</i> | 1   | 2  | <i>E. caballus</i>     | Ribeirão Grande            | São Paulo | 24°5'S 48°21'W  | December 2001  | CNC 605  |
| <i>A. sculptum</i> | 3   | 5  | free living            | Ribeirão Grande            | São Paulo | 24°5'S 48°21'W  | December 2005  | CNC 989  |
| <i>A. sculptum</i> | 30  | 9  | <i>H. hydrochaeris</i> | Ribeirão Preto             | São Paulo | 21°10'S 47°48'W | March 2005     | CNC 960  |
| <i>A. sculptum</i> | 5   | 2  | <i>P. tajacu</i>       | Santa Rita do Passa Quatro | São Paulo | 21°42'S 47°28'W | March 2003     | CNC 762  |
| <i>A. sculptum</i> |     | 1  | <i>D. novemcinctus</i> | São Paulo                  | São Paulo | 23°32'S 46°38'W | January 2013   | CNC 2424 |
| <i>A. sculptum</i> |     | 1  | <i>H. hydrochaeris</i> | São Paulo                  | São Paulo | 23°32'S 46°38'W | July 2005      | CNC 2435 |
| <i>A. sculptum</i> | 1   | 3  | <i>H. hydrochaeris</i> | São Paulo                  | São Paulo | 23°32'S 46°38'W | June 2013      | CNC 2487 |
| <i>A. sculptum</i> |     | 1  | <i>Nasua nasua</i>     | São Paulo                  | São Paulo | 23°32'S 46°38'W | June 2013      | CNC 2484 |
| <i>A. sculptum</i> |     | 1  | <i>T. terrestris</i>   | São Paulo                  | São Paulo | 23°32'S 46°38'W | February 2010  | CNC 2423 |
| <i>A. sculptum</i> | 118 | 33 | <i>P. tajacu</i>       | Sete Barras                | São Paulo | 24°23'S 47°55'W | February 2013  | CNC 2427 |
| <i>A. sculptum</i> | 1   | 1  | <i>C. brachyurus</i>   | Sorocaba                   | São Paulo | 23°30'S 47°27'W | August 1997    | CNC 92   |
| <i>A. sculptum</i> |     | 1  | <i>H. hydrochaeris</i> | Sorocaba                   | São Paulo | 23°30'S 47°27'W | June 2007      | CNC 1049 |
| <i>A. sculptum</i> | 2   | 2  | <i>H. hydrochaeris</i> | Sorocaba                   | São Paulo | 23°30'S 47°27'W | December 2009  | CNC 1502 |
| <i>A. sculptum</i> | 11  | 2  | <i>H. hydrochaeris</i> | Sorocaba                   | São Paulo | 23°30'S 47°27'W | December 2013  | CNC 2588 |
| <i>A. sculptum</i> |     | 1  | <i>M. tridactyla</i>   | Sorocaba                   | São Paulo | 23°30'S 47°27'W | December 2012  | CNC 2300 |
| <i>A. sculptum</i> |     | 1  | <i>L. Pardalis</i>     | Teodoro Sampaio            | São Paulo | 22°31'S 52°10'W | November 1999  | CNC 1439 |
| <i>A. sculptum</i> |     | 8  | <i>P. onca</i>         | Teodoro Sampaio            | São Paulo | 22°31'S 52°10'W | July 2003      | CNC 790  |
| <i>A. sculptum</i> | 8   | 9  | <i>P. tajacu</i>       | Teodoro Sampaio            | São Paulo | 22°31'S 52°10'W | July 2002      | CNC 753  |
| <i>A. sculptum</i> | 1   | 1  | <i>P. tajacu</i>       | Teodoro Sampaio            | São Paulo | 22°31'S 52°10'W | June 2002      | CNC 757  |
| <i>A. sculptum</i> | 9   | 3  | <i>P. tajacu</i>       | Teodoro Sampaio            | São Paulo | 22°31'S 52°10'W | June 2002      | CNC 759  |
| <i>A. sculptum</i> | 2   | 1  | <i>P. tajacu</i>       | Teodoro Sampaio            | São Paulo | 22°31'S 52°10'W | December 2003  | CNC 805  |
| <i>A. sculptum</i> | 17  | 13 | <i>P. tajacu</i>       | Teodoro Sampaio            | São Paulo | 22°31'S 52°10'W | January 2004   | CNC 856  |
| <i>A. sculptum</i> | 6   | 2  | <i>T. terrestris</i>   | Teodoro Sampaio            | São Paulo | 22°31'S 52°10'W | January 2007   | CNC 1001 |
| <i>A. sculptum</i> | 5   | 7  | <i>T. terrestris</i>   | Teodoro Sampaio            | São Paulo | 22°31'S 52°10'W | January 2007   | CNC 1002 |
| <i>A. sculptum</i> | 1   | 5  | <i>T. terrestris</i>   | Teodoro Sampaio            | São Paulo | 22°31'S 52°10'W | January 2007   | CNC 1003 |
| <i>A. sculptum</i> | 5   | 9  | <i>T. terrestris</i>   | Teodoro Sampaio            | São Paulo | 22°31'S 52°10'W | January 2007   | CNC 1004 |
| <i>A. sculptum</i> | 2   | 3  | <i>T. terrestris</i>   | Teodoro Sampaio            | São Paulo | 22°31'S 52°10'W | June 2007      | CNC 1032 |
| <i>A. sculptum</i> | 8   | 9  | <i>T. pecari</i>       | Teodoro Sampaio            | São Paulo | 22°31'S 52°10'W | April 2002     | CNC 653  |
| <i>A. sculptum</i> | 1   | 5  | <i>T. pecari</i>       | Teodoro Sampaio            | São Paulo | 22°31'S 52°10'W | March 2004     | CNC 839  |
| <i>A. sculptum</i> | 49  | 27 | <i>T. pecari</i>       | Teodoro Sampaio            | São Paulo | 22°31'S 52°10'W | March 2005     | CNC 904  |
| <i>A. sculptum</i> | 12  | 16 | <i>T. pecari</i>       | Teodoro Sampaio            | São Paulo | 22°31'S 52°10'W | October 2005   | CNC 930  |
| <i>A. sculptum</i> | 5   | 1  | <i>T. pecari</i>       | Teodoro Sampaio            | São Paulo | 22°31'S 52°10'W | July 2001      | CNC 1029 |
| <i>A. sculptum</i> | 1   | 3  | <i>T. pecari</i>       | Teodoro Sampaio            | São Paulo | 22°31'S 52°10'W | January 2001   | CNC 1031 |
| <i>A. sculptum</i> |     | 1  | free living            | Teodoro Sampaio            | São Paulo | 22°31'S 52°10'W | September 2000 | CNC 360  |
| <i>A. sculptum</i> | 3   | 1  | free living            | Teodoro Sampaio            | São Paulo | 22°31'S 52°10'W | March 2005     | CNC 905  |
| <i>A. sculptum</i> | 24  | 19 | free living            | Teodoro Sampaio            | São Paulo | 22°31'S 52°10'W | July 2005      | CNC 931  |
| <i>A. sculptum</i> | 12  | 10 | free living            | Teodoro Sampaio            | São Paulo | 22°31'S 52°10'W | February 2006  | CNC 988  |

|                      |    |    |                       |                       |                    |                 |                |          |
|----------------------|----|----|-----------------------|-----------------------|--------------------|-----------------|----------------|----------|
| <i>A. sculptum</i>   | 22 | 8  | free living           | Teodoro Sampaio       | São Paulo          | 22°31'S 52°10'W | November 2006  | CNC 1213 |
| <i>A. sculptum</i>   | 5  | 4  | free living           | Teodoro Sampaio       | São Paulo          | 22°31'S 52°10'W | October 2005   | CNC 1236 |
| <i>A. sculptum</i>   | 2  | 1  | free living           | Teodoro Sampaio       | São Paulo          | 22°31'S 52°10'W | April 2006     | CNC 1239 |
| <i>A. sculptum</i>   | 33 | 26 | free living           | Teodoro Sampaio       | São Paulo          | 22°31'S 52°10'W | November 2006  | CNC 1250 |
| <i>A. sculptum</i>   | 1  | 1  | free living           | Ubatuba               | São Paulo          | 23°26'S 45°4'W  | January 2005   | CNC 880  |
| <i>A. sculptum</i>   |    | 4  | <i>E. caballus</i>    | Alvorada do Sul       | Paraná             | 22°46'S 51°13'W | May 2012       | CNC3157  |
| <i>A. sculptum</i>   |    | 21 | <i>E. caballus</i>    | Londrina              | Paraná             | 23°18'S 51°9'W  | June 2004      | CNC 2656 |
| <i>A. sculptum</i>   |    | 1  | <i>H. sapiens</i>     | Londrina              | Paraná             | 23°18'S 51°9'W  | December 2013  | CNC 2600 |
| <i>A. sculptum</i>   | 1  | 1  | <i>T. terrestris</i>  | Foz do Iguaçu         | Paraná             | 25°32'S 54°35'W | March 1998     | CNC 126  |
| <i>A. sculptum</i>   | 1  | 1  | <i>E. caballus</i>    | Rosário do Ivaí       | Paraná             | 24°16'S 51°16'W | January 2012   | CNC 2657 |
| <i>A. sculptum</i> * |    | 9  | <i>C. familiaris</i>  | Cristalândia          | Tocantins          | 10°36'S 49°11'W | August 2011    | CNC 2619 |
| <i>A. sculptum</i> * | 3  | 3  | <i>E. caballus</i>    | Balsas                | Maranhão           | 7°31'S 46°2'W   | July 2011      | CNC 2631 |
| <i>A. sculptum</i> * | 11 | 5  | <i>C. thous</i>       | Barão de Melgaço      | Mato Grosso        | 16°11'S 55°58'W | September 2002 | CNC 739  |
| <i>A. sculptum</i> * | 2  | 2  | <i>C. thous</i>       | Barão de Melgaço      | Mato Grosso        | 16°11'S 55°58'W | July 2003      | CNC 789  |
| <i>A. sculptum</i> * | 24 | 20 | <i>C. thous</i>       | Barão de Melgaço      | Mato Grosso        | 16°11'S 55°58'W | August 2003    | CNC 791  |
| <i>A. sculptum</i> * |    | 3  | <i>C. thous</i>       | Barão de Melgaço      | Mato Grosso        | 16°11'S 55°58'W | October 2002   | CNC 793  |
| <i>A. sculptum</i> * | 3  | 1  | <i>C. thous</i>       | Barão de Melgaço      | Mato Grosso        | 16°11'S 55°58'W | January 2004   | CNC 828  |
| <i>A. sculptum</i> * | 4  | 2  | <i>C. thous</i>       | Barão de Melgaço      | Mato Grosso        | 16°11'S 55°58'W | March 2004     | CNC 841  |
| <i>A. sculptum</i> * | 25 | 49 | <i>C. thous</i>       | Barão de Melgaço      | Mato Grosso        | 16°11'S 55°58'W | September 2004 | CNC 870  |
| <i>A. sculptum</i> * | 26 | 49 | <i>C. brachyurus</i>  | Barão de Melgaço      | Mato Grosso        | 16°11'S 55°58'W | August 2002    | CNC 731  |
| <i>A. sculptum</i> * | 4  | 9  | <i>C. brachyurus</i>  | Barão de Melgaço      | Mato Grosso        | 16°11'S 55°58'W | September 2002 | CNC 741  |
| <i>A. sculptum</i> * | 8  | 22 | <i>C. brachyurus</i>  | Barão de Melgaço      | Mato Grosso        | 16°11'S 55°58'W | October 2002   | CNC 794  |
| <i>A. sculptum</i> * | 15 | 26 | <i>C. brachyurus</i>  | Barão de Melgaço      | Mato Grosso        | 16°11'S 55°58'W | December 2003  | CNC 804  |
| <i>A. sculptum</i> * | 7  | 12 | <i>C. brachyurus</i>  | Barão de Melgaço      | Mato Grosso        | 16°11'S 55°58'W | August 2006    | CNC 993  |
| <i>A. sculptum</i> * | 44 | 76 | <i>L. pardalis</i>    | Barão de Melgaço      | Mato Grosso        | 16°11'S 55°58'W | July 2004      | CNC 869  |
| <i>A. sculptum</i> * | 3  | 10 | <i>P. cancrivorus</i> | Barão de Melgaço      | Mato Grosso        | 16°11'S 55°58'W | July 2002      | CNC 716  |
| <i>A. sculptum</i> * | 26 | 11 | <i>P. cancrivorus</i> | Barão de Melgaço      | Mato Grosso        | 16°11'S 55°58'W | August 2002    | CNC 730  |
| <i>A. sculptum</i> * | 3  | 6  | <i>P. cancrivorus</i> | Barão de Melgaço      | Mato Grosso        | 16°11'S 55°58'W | September 2002 | CNC 740  |
| <i>A. sculptum</i> * | 2  | 4  | <i>P. cancrivorus</i> | Barão de Melgaço      | Mato Grosso        | 16°11'S 55°58'W | October 2003   | CNC 803  |
| <i>A. sculptum</i> * | 1  | 1  | <i>S. venaticus</i>   | Barão de Melgaço      | Mato Grosso        | 16°11'S 55°58'W | July 2004      | CNC 853  |
| <i>A. sculptum</i> * |    | 2  | <i>S. venaticus</i>   | Barão de Melgaço      | Mato Grosso        | 16°11'S 55°58'W | August 2006    | CNC 994  |
| <i>A. sculptum</i> * | 6  | 2  | <i>C. thous</i>       | Chapada dos Guimarães | Mato Grosso        | 15°27'S 55°45'W | August 2001    | CNC 551  |
| <i>A. sculptum</i> * | 4  | 2  | <i>C. thous</i>       | Chapada dos Guimarães | Mato Grosso        | 15°27'S 55°45'W | June 2001      | CNC 552  |
| <i>A. sculptum</i> * | 8  | 9  | <i>C. thous</i>       | Chapada dos Guimarães | Mato Grosso        | 15°27'S 55°45'W | June 2001      | CNC 553  |
| <i>A. sculptum</i> * | 4  | 7  | <i>C. thous</i>       | Chapada dos Guimarães | Mato Grosso        | 15°27'S 55°45'W | August 2001    | CNC 674  |
| <i>A. sculptum</i> * |    | 1  | <i>C. thous</i>       | Água Clara            | Mato Grosso do Sul | 20°26'S 52°52'W | August 2011    | CNC 1946 |
| <i>A. sculptum</i> * |    | 1  | <i>P. cancrivorus</i> | Anastácio             | Mato Grosso do Sul | 20°29'S 55°48'W | August 2011    | CNC 1945 |
| <i>A. sculptum</i> * | 2  | 6  | <i>P. concolor</i>    | Anaurilândia          | Mato Grosso do Sul | 22°11'S 52°43'W | June 2001      | CNC 530  |
| <i>A. sculptum</i> * | 18 | 13 | <i>M. tridactyla</i>  | Aquidauana            | Mato Grosso do Sul | 20°28'S 55°47'W | November 2013  | CNC 2542 |

|                      |    |     |                        |                      |                    |                 |                |          |
|----------------------|----|-----|------------------------|----------------------|--------------------|-----------------|----------------|----------|
| <i>A. sculptum</i> * | 2  | 22  | <i>T. terrestris</i>   | Aquidauana           | Mato Grosso do Sul | 20°28'S 55°47'W | May 2010       | CNC 1588 |
| <i>A. sculptum</i> * | 30 | 53  | <i>T. terrestris</i>   | Aquidauana           | Mato Grosso do Sul | 20°28'S 55°47'W | September 2011 | CNC 1960 |
| <i>A. sculptum</i> * | 47 | 104 | <i>T. terrestris</i>   | Aquidauana           | Mato Grosso do Sul | 20°28'S 55°47'W | November 2011  | CNC 2080 |
| <i>A. sculptum</i> * | 47 | 71  | <i>T. terrestris</i>   | Aquidauana           | Mato Grosso do Sul | 20°28'S 55°47'W | July 2012      | CNC 2237 |
| <i>A. sculptum</i> * | 32 | 69  | <i>T. terrestris</i>   | Aquidauana           | Mato Grosso do Sul | 20°28'S 55°47'W | September 2012 | CNC 2268 |
| <i>A. sculptum</i> * | 23 | 20  | <i>T. terrestris</i>   | Aquidauana           | Mato Grosso do Sul | 20°28'S 55°47'W | October 2013   | CNC 2538 |
| <i>A. sculptum</i> * | 3  | 2   | <i>M. gouazoubira</i>  | Brasilândia          | Mato Grosso do Sul | 21°15'S 52°2'W  | August 2000    | CNC 327  |
| <i>A. sculptum</i> * | 1  | 2   | <i>M. tridactyla</i>   | Brasilândia          | Mato Grosso do Sul | 21°15'S 52°2'W  | July 2000      | CNC 332  |
| <i>A. sculptum</i> * | 17 | 28  | <i>P. tajacu</i>       | Corumbá              | Mato Grosso do Sul | 19°0'S 57°39'W  | September 1997 | CNC 99   |
| <i>A. sculptum</i> * | 1  | 1   | <i>P. tajacu</i>       | Corumbá              | Mato Grosso do Sul | 19°0'S 57°39'W  | September 1997 | CNC 100  |
| <i>A. sculptum</i> * | 12 | 6   | <i>M. tridactyla</i>   | Miranda              | Mato Grosso do Sul | 20°14'S 56°22'W | July 2011      | CNC 1948 |
| <i>A. sculptum</i> * | 6  | 2   | <i>T. terrestris</i>   | Miranda              | Mato Grosso do Sul | 20°14'S 56°22'W | June 2008      | CNC 1123 |
| <i>A. sculptum</i> * | 4  | 7   | <i>T. terrestris</i>   | Miranda              | Mato Grosso do Sul | 20°14'S 56°22'W | July 2010      | CNC 1637 |
| <i>A. sculptum</i> * |    | 1   | <i>H. sapiens</i>      | Colatina             | Espírito Santo     | 19°32'S 40°37'W | September 2007 | CNC 1069 |
| <i>A. sculptum</i> * | 47 | 53  | free living            | Colatina             | Espírito Santo     | 19°32'S 40°37'W | October 2007   | CNC 1082 |
| <i>A. sculptum</i> * | 2  | 7   | <i>E. caballus</i>     | Guarapari            | Espírito Santo     | 20°39'S 40°30'W | July 2001      | CNC 529  |
| <i>A. sculptum</i> * | 3  | 4   | <i>C. familiaris</i>   | Nova Venécia         | Espírito Santo     | 18°42'S 40°24'W | September 2007 | CNC 1055 |
| <i>A. sculptum</i> * | 12 | 17  | <i>E. caballus</i>     | Nova Venécia         | Espírito Santo     | 18°42'S 40°24'W | September 2007 | CNC 1056 |
| <i>A. sculptum</i> * | 2  | 1   | <i>C. familiaris</i>   | Santana do Riacho    | Minas Gerais       | 19°10'S 43°42'W | September 2012 | CNC 2253 |
| <i>A. sculptum</i> * | 5  | 11  | <i>E. caballus</i>     | Santana do Riacho    | Minas Gerais       | 19°10'S 43°42'W | September 2012 | CNC 2252 |
| <i>A. sculptum</i> * |    | 4   | <i>C. brachyurus</i>   | São Roque de Minas   | Minas Gerais       | 20°14'S 46°21'W | January 2005   | CNC 981  |
| <i>A. sculptum</i> * | 1  | 1   | <i>C. brachyurus</i>   | São Roque de Minas   | Minas Gerais       | 20°14'S 46°21'W | January 2006   | CNC 1013 |
| <i>A. sculptum</i> * | 6  | 12  | <i>C. brachyurus</i>   | São Roque de Minas   | Minas Gerais       | 20°14'S 46°21'W | October 2006   | CNC 1022 |
| <i>A. sculptum</i> * | 3  | 2   | <i>L. vetulus</i>      | São Roque de Minas   | Minas Gerais       | 20°14'S 46°21'W | October 2005   | CNC 980  |
| <i>A. sculptum</i> * | 11 | 44  | <i>H. hydrochaeris</i> | Três Rios            | Rio de Janeiro     | 22°7'S 43°12'W  | September 2008 | CNC 1159 |
| <i>A. sculptum</i> * |    | 1   | <i>C. familiaris</i>   | Araçariguama         | São Paulo          | 23°26'S 47°3'W  | March 2009     | CNC 1405 |
| <i>A. sculptum</i> * | 1  | 2   | <i>C. familiaris</i>   | Araçariguama         | São Paulo          | 23°26'S 47°3'W  | March 2009     | CNC 1434 |
| <i>A. sculptum</i> * |    | 1   | <i>C. familiaris</i>   | Campo Limpo Paulista | São Paulo          | 23°12'S 46°47'W | November 1999  | CNC 254  |
| <i>A. sculptum</i> * | 2  | 2   | <i>T. caudatus</i>     | Franca               | São Paulo          | 20°32'S 47°24'W | July 2002      | CNC 729  |
| <i>A. sculptum</i> * |    | 1   | <i>H. sapiens</i>      | Itu                  | São Paulo          | 23°15'S 47°17'W | January 2006   | CNC 966  |
| <i>A. sculptum</i> * | 1  | 5   | <i>M. tridactyla</i>   | Itu                  | São Paulo          | 23°15'S 47°17'W | April 2009     | CNC 1416 |
| <i>A. sculptum</i> * |    | 1   | <i>T. terrestris</i>   | Itu                  | São Paulo          | 23°15'S 47°17'W | May 2001       | CNC 493  |
| <i>A. sculptum</i> * | 2  | 1   | <i>C. familiaris</i>   | Jarinu               | São Paulo          | 23°6'S 46° 43'W | October 2009   | CNC 1454 |
| <i>A. sculptum</i> * |    | 1   | "hawk"                 | Jundiaí              | São Paulo          | 23°11'S 46°53'W | October 1998   | CNC 172  |
| <i>A. sculptum</i> * | 4  | 6   | <i>M. gouazoubira</i>  | Jundiaí              | São Paulo          | 23°11'S 46°53'W | August 1999    | CNC 242  |
| <i>A. sculptum</i> * |    | 2   | <i>M. gouazoubira</i>  | Jundiaí              | São Paulo          | 23°11'S 46°53'W | August 1999    | CNC 243  |
| <i>A. sculptum</i> * | 2  | 2   | <i>M. gouazoubira</i>  | Jundiaí              | São Paulo          | 23°11'S 46°53'W | November 1999  | CNC 276  |
| <i>A. sculptum</i> * |    | 1   | <i>S. brasiliensis</i> | Jundiaí              | São Paulo          | 23°11'S 46°53'W | October 1999   | CNC 250  |
| <i>A. sculptum</i> * | 1  | 2   | <i>P. tajacu</i>       | Luís Antônio         | São Paulo          | 21°33'S 47°42'W | August 2001    | CNC 565  |

|                      |    |    |                        |                        |           |                 |                |          |
|----------------------|----|----|------------------------|------------------------|-----------|-----------------|----------------|----------|
| <i>A. sculptum</i> * | 12 | 5  | free living            | Panorama               | São Paulo | 21°21'S 51°51'W | July 2002      | CNC 722  |
| <i>A. sculptum</i> * |    | 3  | <i>E. caballus</i>     | Pauliceia              | São Paulo | 21°19'S 51°49'W | July 2002      | CNC 720  |
| <i>A. sculptum</i> * | 1  | 3  | free living            | Pauliceia              | São Paulo | 21°19'S 51°49'W | April 2002     | CNC 668  |
| <i>A. sculptum</i> * | 2  | 5  | free living            | Pauliceia              | São Paulo | 21°19'S 51°49'W | April 2002     | CNC 683  |
| <i>A. sculptum</i> * | 15 | 20 | free living            | Pauliceia              | São Paulo | 21°19'S 51°49'W | April 2002     | CNC 684  |
| <i>A. sculptum</i> * | 22 | 30 | free living            | Pauliceia              | São Paulo | 21°19'S 51°49'W | July 2002      | CNC 736  |
| <i>A. sculptum</i> * | 5  | 2  | <i>H. sapiens</i>      | Pedreira               | São Paulo | 22°44'S 46°54'W | December 2000  | CNC 425  |
| <i>A. sculptum</i> * | 1  | 3  | <i>D. albiventris</i>  | Pirassununga           | São Paulo | 21°59'S 47°25'W | October 2000   | CNC 364  |
| <i>A. sculptum</i> * | 1  | 2  | <i>C. thous</i>        | Presidente Epitácio    | São Paulo | 21°45'S 52°6'W  | May 2001       | CNC 488  |
| <i>A. sculptum</i> * | 8  | 15 | <i>P. tajacu</i>       | Presidente Epitácio    | São Paulo | 21°45'S 52°6'W  | May 2001       | CNC 489  |
| <i>A. sculptum</i> * | 3  | 12 | <i>M. gouazoubira</i>  | Ribeirão Grande        | São Paulo | 24°5'S 48°21'W  | December 2001  | CNC 606  |
| <i>A. sculptum</i> * | 13 | 11 | <i>C. brachyurus</i>   | Ribeirão Preto         | São Paulo | 21°10'S 47°48'W | August 1999    | CNC 297  |
| <i>A. sculptum</i> * |    | 1  | <i>C. brachyurus</i>   | Ribeirão Preto         | São Paulo | 21°10'S 47°48'W | September 2002 | CNC 799  |
| <i>A. sculptum</i> * | 2  | 3  | <i>C. familiaris</i>   | São Luiz do Paraitinga | São Paulo | 23°13'S 45°18'W | September 2013 | CNC 2523 |
| <i>A. sculptum</i> * | 4  | 1  | <i>H. hydrochaeris</i> | São Paulo              | São Paulo | 23°32'S 46°38'W | August 2012    | CNC 713  |
| <i>A. sculptum</i> * | 6  | 3  | <i>H. hydrochaeris</i> | São Paulo              | São Paulo | 23°32'S 46°38'W | June 2006      | CNC 983  |
| <i>A. sculptum</i> * | 13 | 5  | <i>H. hydrochaeris</i> | São Paulo              | São Paulo | 23°32'S 46°38'W | June 2006      | CNC 984  |
| <i>A. sculptum</i> * | 4  | 1  | <i>H. hydrochaeris</i> | São Paulo              | São Paulo | 23°32'S 46°38'W | June 2006      | CNC 985  |
| <i>A. sculptum</i> * | 7  | 2  | <i>H. hydrochaeris</i> | São Paulo              | São Paulo | 23°32'S 46°38'W | June 2006      | CNC 986  |
| <i>A. sculptum</i> * |    | 2  | <i>C. cristata</i>     | Sorocaba               | São Paulo | 23°30'S 47°27'W | September 2007 | CNC 1053 |
| <i>A. sculptum</i> * | 6  | 34 | <i>M. gouazoubira</i>  | Sorocaba               | São Paulo | 23°30'S 47°27'W | September 2007 | CNC 1054 |
| <i>A. sculptum</i> * | 4  | 3  | <i>M. gouazoubira</i>  | Sorocaba               | São Paulo | 23°30'S 47°27'W | September 2007 | CNC 1077 |
| <i>A. sculptum</i> * | 1  | 2  | <i>D. azarae</i>       | Teodoro Sampaio        | São Paulo | 22°31'S 52°10'W | May 2002       | CNC 701  |
| <i>A. sculptum</i> * |    | 1  | <i>D. azarae</i>       | Teodoro Sampaio        | São Paulo | 22°31'S 52°10'W | January 2009   | CNC 1366 |
| <i>A. sculptum</i> * | 3  | 3  | <i>T. terrestris</i>   | Teodoro Sampaio        | São Paulo | 22°31'S 52°10'W | July 2006      | CNC 972  |
| <i>A. sculptum</i> * | 19 | 29 | <i>T. terrestris</i>   | Teodoro Sampaio        | São Paulo | 22°31'S 52°10'W | July 2008      | CNC 1148 |
| <i>A. sculptum</i> * | 14 | 13 | <i>T. pecari</i>       | Teodoro Sampaio        | São Paulo | 22°31'S 52°10'W | June 2002      | CNC 702  |
| <i>A. sculptum</i> * |    | 2  | <i>T. pecari</i>       | Teodoro Sampaio        | São Paulo | 22°31'S 52°10'W | May 2004       | CNC 850  |
| <i>A. sculptum</i> * | 13 | 14 | <i>T. pecari</i>       | Teodoro Sampaio        | São Paulo | 22°31'S 52°10'W | January 2005   | CNC 978  |
| <i>A. sculptum</i> * | 1  | 3  | free living            | Teodoro Sampaio        | São Paulo | 22°31'S 52°10'W | April 2006     | CNC 1202 |
| <i>A. sculptum</i> * | 1  | 2  | free living            | Teodoro Sampaio        | São Paulo | 22°31'S 52°10'W | November 2006  | CNC 1203 |
| <i>A. sculptum</i> * | 32 | 21 | free living            | Teodoro Sampaio        | São Paulo | 22°31'S 52°10'W | October 2005   | CNC 1206 |
| <i>A. sculptum</i> * | 23 | 29 | free living            | Teodoro Sampaio        | São Paulo | 22°31'S 52°10'W | August 2005    | CNC 1207 |
| <i>A. sculptum</i> * | 6  | 5  | free living            | Teodoro Sampaio        | São Paulo | 22°31'S 52°10'W | August 2005    | CNC 1208 |
| <i>A. sculptum</i> * | 7  | 7  | free living            | Teodoro Sampaio        | São Paulo | 22°31'S 52°10'W | July 2006      | CNC 1209 |
| <i>A. sculptum</i> * | 15 | 21 | free living            | Teodoro Sampaio        | São Paulo | 22°31'S 52°10'W | October 2005   | CNC 1210 |
| <i>A. sculptum</i> * | 2  | 7  | free living            | Teodoro Sampaio        | São Paulo | 22°31'S 52°10'W | January 2006   | CNC 1211 |
| <i>A. sculptum</i> * | 15 | 7  | free living            | Teodoro Sampaio        | São Paulo | 22°31'S 52°10'W | May 2005       | CNC 1212 |
| <i>A. sculptum</i> * | 16 | 20 | free living            | Teodoro Sampaio        | São Paulo | 22°31'S 52°10'W | November 2006  | CNC 1214 |

|                            |    |     |                        |                           |              |                 |                |          |
|----------------------------|----|-----|------------------------|---------------------------|--------------|-----------------|----------------|----------|
| <i>A. sculptum</i> *       |    | 67  | free living            | Teodoro Sampaio           | São Paulo    | 22°31'S 52°10'W | August 2005    | CNC 1215 |
| <i>A. sculptum</i> *       |    | 200 | free living            | Teodoro Sampaio           | São Paulo    | 22°31'S 52°10'W | August 2005    | CNC 1220 |
| <i>A. sculptum</i> *       |    | 213 | free living            | Teodoro Sampaio           | São Paulo    | 22°31'S 52°10'W | August 2005    | CNC 1221 |
| <i>A. sculptum</i> *       | 66 | 8   | free living            | Teodoro Sampaio           | São Paulo    | 22°31'S 52°10'W | August 2005    | CNC 1222 |
| <i>A. sculptum</i> *       |    | 100 | free living            | Teodoro Sampaio           | São Paulo    | 22°31'S 52°10'W | October 2005   | CNC 1224 |
| <i>A. sculptum</i> *       |    | 130 | free living            | Teodoro Sampaio           | São Paulo    | 22°31'S 52°10'W | October 2005   | CNC 1226 |
| <i>A. sculptum</i> *       |    | 89  | free living            | Teodoro Sampaio           | São Paulo    | 22°31'S 52°10'W | October 2005   | CNC 1228 |
| <i>A. sculptum</i> *       |    | 100 | free living            | Teodoro Sampaio           | São Paulo    | 22°31'S 52°10'W | July 2005      | CNC 1230 |
| <i>A. sculptum</i> *       |    | 100 | free living            | Teodoro Sampaio           | São Paulo    | 22°31'S 52°10'W | July 2005      | CNC 1231 |
| <i>A. sculptum</i> *       |    | 120 | free living            | Teodoro Sampaio           | São Paulo    | 22°31'S 52°10'W | July 2005      | CNC 1232 |
| <i>A. sculptum</i> *       | 62 | 47  | free living            | Teodoro Sampaio           | São Paulo    | 22°31'S 52°10'W | September 2005 | CNC 1235 |
| <i>A. sculptum</i> *       | 6  | 3   | free living            | Teodoro Sampaio           | São Paulo    | 22°31'S 52°10'W | October 2005   | CNC 1237 |
| <i>A. sculptum</i> *       | 15 | 34  | free living            | Teodoro Sampaio           | São Paulo    | 22°31'S 52°10'W | July 2006      | CNC 1238 |
| <i>A. sculptum</i> *       | 1  | 38  | free living            | Teodoro Sampaio           | São Paulo    | 22°31'S 52°10'W | August 2005    | CNC 1242 |
| <i>A. sculptum</i> *       | 15 | 7   | free living            | Teodoro Sampaio           | São Paulo    | 22°31'S 52°10'W | October 2005   | CNC 1244 |
| <i>A. sculptum</i> *       | 41 | 52  | free living            | Teodoro Sampaio           | São Paulo    | 22°31'S 52°10'W | July 2005      | CNC 1247 |
| <i>A. sculptum</i> *       | 7  | 12  | free living            | Teodoro Sampaio           | São Paulo    | 22°31'S 52°10'W | July 2006      | CNC 1248 |
| <i>A. sculptum</i> *       | 8  | 12  | free living            | Teodoro Sampaio           | São Paulo    | 22°31'S 52°10'W | November 2006  | CNC 1251 |
| <i>A. sculptum</i> *       |    | 1   | <i>C. familiaris</i>   | Adrianópolis              | Paraná       | 24°39'S 48°59'W | August 2012    | CNC 2254 |
| <i>A. sculptum</i> *       |    | 1   | <i>D. albiventris</i>  | Teodoro Sampaio           | São Paulo    | 22°31'S 52°10'W | June 2008      | CNC 1134 |
| <i>A. sculptum</i> **      | 14 | 27  | <i>C. thous</i>        | Barão de Melgaço          | Mato Grosso  | 16°11'S 55°58'W | July 2004      | CNC 868  |
| <i>A. sculptum</i> **      | 18 | 30  | <i>L. pardalis</i>     | Chapada Gaúcha            | Minas Gerais | 15°18'S 45°37'W | July 2009      | CNC 1452 |
| <i>A. cajennense s. l.</i> | 1  |     | <i>H. hydrochaeris</i> | Marabá                    | Pará         | 5°22'S 49°7'W   | July 2001      | CNC 503  |
| <i>A. cajennense s. l.</i> | 1  |     | <i>T. terrestris</i>   | Governador Jorge Teixeira | Rondônia     | 10°31'S 62°38'W | December 2000  | CNC 413  |
| <i>A. cajennense s. l.</i> | 3  |     | free living            | Governador Jorge Teixeira | Rondônia     | 10°31'S 62°38'W | June 2001      | CNC 541  |
| <i>A. cajennense s. l.</i> | 3  |     | free living            | Governador Jorge Teixeira | Rondônia     | 10°31'S 62°38'W | December 2001  | CNC 579  |
| <i>A. cajennense s. l.</i> | 2  |     | free living            | Governador Jorge Teixeira | Rondônia     | 10°31'S 62°38'W | February 2009  | CNC 1409 |
| <i>A. cajennense s. l.</i> | 81 |     | <i>M. tridactyla</i>   | Araguaína                 | Tocantins    | 7°11'S 48°12'W  | April 2013     | CNC 2574 |
| <i>A. cajennense s. l.</i> | 1  |     | free living            | Araguaína                 | Tocantins    | 7°11'S 48°12'W  | May 2013       | CNC 2575 |
| <i>A. cajennense s. l.</i> | 2  |     | <i>P. tajacu</i>       | Araguatins                | Tocantins    | 5°39'S 48°7'W   | July 2012      | CNC 2263 |
| <i>A. cajennense s. l.</i> | 1  |     | <i>C. familiaris</i>   | Caseara                   | Tocantins    | 9°16'S 49°57'W  | May 2009       | CNC 1710 |
| <i>A. cajennense s. l.</i> | 6  |     | <i>E. caballus</i>     | Goiatins                  | Tocantins    | 7°42'S 47°18'W  | September 2007 | CNC 1059 |
| <i>A. cajennense s. l.</i> | 3  |     | <i>B. taurus</i>       | Lagoa da Confusão         | Tocantins    | 10°47'S 49°37'W | August 2009    | CNC 1795 |
| <i>A. cajennense s. l.</i> | 36 |     | <i>M. tridactyla</i>   | Lagoa da Confusão         | Tocantins    | 10°47'S 49°37'W | May 2013       | CNC 2573 |
| <i>A. cajennense s. l.</i> | 1  |     | <i>T. tetradactyla</i> | Presidente Kennedy        | Tocantins    | 8°32'S 48°30'W  | December 2012  | CNC 2330 |
| <i>A. cajennense s. l.</i> | 1  |     | free living            | Ipiaú                     | Bahia        | 14°8'S 39°44'W  | September 2011 | CNC 2628 |
| <i>A. cajennense s. l.</i> | 1  |     | <i>E. caballus</i>     | Gravatá                   | Pernambuco   | 8°12'S 35°33'W  | January 2008   | CNC 1324 |
| <i>A. cajennense s. l.</i> | 1  |     | <i>E. caballus</i>     | Gravatá                   | Pernambuco   | 8°12'S 35°33'W  | December 2007  | CNC 1327 |
| <i>A. cajennense s. l.</i> | 1  |     | <i>E. caballus</i>     | Sairé                     | Pernambuco   | 8°19'S 35°42'W  | January 2008   | CNC 1322 |

|                            |   |  |                        |                         |                    |                 |                |          |
|----------------------------|---|--|------------------------|-------------------------|--------------------|-----------------|----------------|----------|
| <i>A. cajennense s. l.</i> | 1 |  | <i>H. sapiens</i>      | Brasília                | Distrito Federal   | 15°47'S 47°52'W | January 1999   | CNC 195  |
| <i>A. cajennense s. l.</i> | 2 |  | <i>P. onca</i>         | Brasília                | Distrito Federal   | 15°47'S 47°52'W | January 1999   | CNC 192  |
| <i>A. cajennense s. l.</i> | 1 |  | <i>C. brachyurus</i>   | Mineiros                | Goiás              | 17°34'S 52°33'W | May 2005       | CNC 1684 |
| <i>A. cajennense s. l.</i> | 1 |  | <i>P. onca</i>         | Mineiros                | Goiás              | 17°34'S 52°33'W | August 2004    | CNC 1658 |
| <i>A. cajennense s. l.</i> | 1 |  | <i>S. venaticus</i>    | Mineiros                | Goiás              | 17°34'S 52°33'W | November 2002  | CNC 819  |
| <i>A. cajennense s. l.</i> | 2 |  | <i>B. taurus</i>       | Poconé                  | Mato Grosso        | 16°15'S 56°37'W | August 1997    | CNC 93   |
| <i>A. cajennense s. l.</i> | 1 |  | <i>C. familiaris</i>   | Sinop                   | Mato Grosso        | 11°50'S 55°38'W | June 2012      | CNC 2235 |
| <i>A. cajennense s. l.</i> | 3 |  | <i>H. sapiens</i>      | Sinop                   | Mato Grosso        | 11°50'S 55°38'W | June 2010      | CNC 1648 |
| <i>A. cajennense s. l.</i> | 3 |  | <i>P. tajacu</i>       | Anaurilândia            | Mato Grosso do Sul | 22°11'S 52°43'W | March 2001     | CNC 447  |
| <i>A. cajennense s. l.</i> | 2 |  | <i>P. concolor</i>     | Anaurilândia            | Mato Grosso do Sul | 22°11'S 52°43'W | November 2002  | CNC 834  |
| <i>A. cajennense s. l.</i> | 1 |  | <i>M. tridactyla</i>   | Brasilândia             | Mato Grosso do Sul | 21°15'S 52°2'W  | April 2000     | CNC 292  |
| <i>A. cajennense s. l.</i> | 7 |  | <i>M. tridactyla</i>   | Brasilândia             | Mato Grosso do Sul | 21°15'S 52°2'W  | July 2000      | CNC 333  |
| <i>A. cajennense s. l.</i> | 1 |  | <i>M. tridactyla</i>   | Brasilândia             | Mato Grosso do Sul | 21°15'S 52°2'W  | August 2000    | CNC 340  |
| <i>A. cajennense s. l.</i> | 1 |  | <i>T. terrestris</i>   | Bonito                  | Mato Grosso do Sul | 21°7'S 56°28'W  | March 2002     | CNC 624  |
| <i>A. cajennense s. l.</i> | 2 |  | <i>H. hydrochaeris</i> | Corumbá                 | Mato Grosso do Sul | 19°0'S 57°39'W  | September 1997 | CNC 101  |
| <i>A. cajennense s. l.</i> | 1 |  | <i>H. hydrochaeris</i> | Corumbá                 | Mato Grosso do Sul | 19°0'S 57°39'W  | September 1997 | CNC 102  |
| <i>A. cajennense s. l.</i> | 2 |  | <i>T. pecari</i>       | Corumbá                 | Mato Grosso do Sul | 19°0'S 57°39'W  | September 1997 | CNC 95   |
| <i>A. cajennense s. l.</i> | 3 |  | free living            | Corumbá                 | Mato Grosso do Sul | 19°0'S 57°39'W  | September 2008 | CNC 1158 |
| <i>A. cajennense s. l.</i> | 1 |  | <i>C. familiaris</i>   | Miranda                 | Mato Grosso do Sul | 20°14'S 56°22'W | November 2008  | CNC 1709 |
| <i>A. cajennense s. l.</i> | 1 |  | <i>P. concolor</i>     | Naviraí                 | Mato Grosso do Sul | 23°3'S 54°11'W  | May 2004       | CNC 950  |
| <i>A. cajennense s. l.</i> | 1 |  | <i>M. tridactyla</i>   | Nova Alvorada do Sul    | Mato Grosso do Sul | 21°27'S 54°23'W | April 2005     | CNC 896  |
| <i>A. cajennense s. l.</i> | 4 |  | <i>M. tridactyla</i>   | Santa Rita do Pardo     | Mato Grosso do Sul | 21°18'S 52°49'W | August 2000    | CNC 343  |
| <i>A. cajennense s. l.</i> | 1 |  | <i>M. tridactyla</i>   | Santa Rita do Pardo     | Mato Grosso do Sul | 21°18'S 52°49'W | August 2000    | CNC 346  |
| <i>A. cajennense s. l.</i> | 1 |  | free living            | Chapada Gaúcha          | Minas Gerais       | 15°18'S 45°37'W | May 2012       | CNC 2178 |
| <i>A. cajennense s. l.</i> | 1 |  | <i>H. sapiens</i>      | Marliéria               | Minas Gerais       | 19°42'S 42°43'W | October 2012   | CNC 2370 |
| <i>A. cajennense s. l.</i> | 1 |  | free living            | Marliéria               | Minas Gerais       | 19°42'S 42°43'W | October 2013   | CNC 2533 |
| <i>A. cajennense s. l.</i> | 1 |  | <i>E. caballus</i>     | Uberlândia              | Minas Gerais       | 18°55'S 48°16'W | September 2010 | CNC 1669 |
| <i>A. cajennense s. l.</i> | 1 |  | free living            | Araçariguama            | São Paulo          | 23°26'S 47°3'W  | March 1998     | CNC 127  |
| <i>A. cajennense s. l.</i> | 3 |  | <i>M. tridactyla</i>   | Araçoiaba da Serra      | São Paulo          | 23°30'S 47°36'W | November 2010  | CNC 1748 |
| <i>A. cajennense s. l.</i> | 1 |  | <i>C. brachyurus</i>   | Franca                  | São Paulo          | 20°32'S 47°24'W | October 2001   | CNC 518  |
| <i>A. cajennense s. l.</i> | 1 |  | <i>E. caballus</i>     | Guaraci                 | São Paulo          | 20°29'S 48°56'W | January 2005   | CNC 911  |
| <i>A. cajennense s. l.</i> | 1 |  | <i>H. sapiens</i>      | Pauliceia               | São Paulo          | 21°19'S 51°49'W | April 2001     | CNC 452  |
| <i>A. cajennense s. l.</i> | 1 |  | <i>L. tigrinus</i>     | Pedreira                | São Paulo          | 22°44'S 46°54'W | January 1999   | CNC 207  |
| <i>A. cajennense s. l.</i> | 1 |  | <i>D. albiventris</i>  | Presidente Epitácio     | São Paulo          | 21°45'S 52°6'W  | April 2002     | CNC 655  |
| <i>A. cajennense s. l.</i> | 1 |  | free living            | Ribeirão Grande         | São Paulo          | 24°5'S 48°21'W  | July 2005      | CNC 959  |
| <i>A. cajennense s. l.</i> | 1 |  | free living            | Santa Cruz do Rio Pardo | São Paulo          | 22°53'S 49°37'W | April 2007     | CNC 1019 |
| <i>A. cajennense s. l.</i> | 1 |  | <i>C. familiaris</i>   | São Paulo               | São Paulo          | 23°32'S 46°38'W | November 2000  | CNC 367  |
| <i>A. cajennense s. l.</i> | 1 |  | <i>H. sapiens</i>      | Sorocaba                | São Paulo          | 23°30'S 47°27'W | April 2013     | CNC 2454 |
| <i>A. cajennense s. l.</i> | 1 |  | <i>S. villosus</i>     | Sorocaba                | São Paulo          | 23°30'S 47°27'W | October 2007   | CNC 1078 |

|                             |     |  |                        |                    |                    |                 |                |          |
|-----------------------------|-----|--|------------------------|--------------------|--------------------|-----------------|----------------|----------|
| <i>A. cajennense s. l.</i>  | 1   |  | <i>P. tajacu</i>       | Teodoro Sampaio    | São Paulo          | 22°31'S 52°10'W | April 2002     | CNC 654  |
| <i>A. cajennense s. l.</i>  | 1   |  | <i>P. tajacu</i>       | Teodoro Sampaio    | São Paulo          | 22°31'S 52°10'W | July 2001      | CNC 1030 |
| <i>A. cajennense s. l.</i>  | 1   |  | <i>T. pecari</i>       | Teodoro Sampaio    | São Paulo          | 22°31'S 52°10'W | May 2002       | CNC 682  |
| <i>A. cajennense s. l.</i>  | 1   |  | free living            | Teodoro Sampaio    | São Paulo          | 22°31'S 52°10'W | July 2005      | CNC 1246 |
| <i>A. cajennense s. l.</i>  | 1   |  | <i>E. caballus</i>     | Rosário do Ivaí    | Paraná             | 24°16'S 51°16'W | February 2001  | CNC 441  |
| <i>A. cajennense s. l.</i>  | 1   |  | <i>H. sapiens</i>      | Angatuba           | São Paulo          | 23°29'S 48°24'W | October 2010   | CNC 1742 |
| <i>A. cajennense s. l.*</i> | 10  |  | <i>C. familiaris</i>   | Cristalândia       | Tocantins          | 10°36'S 49°11'W | August 2011    | CNC 2619 |
| <i>A. cajennense s. l.*</i> | 2   |  | <i>L. pardalis</i>     | Barão de Melgaço   | Mato Grosso        | 16°11'S 55°58'W | September 2001 | CNC 801  |
| <i>A. cajennense s. l.*</i> | 1   |  | <i>H. sapiens</i>      | Jauru              | Mato Grosso        | 15°20'S 58°51'W | September 2002 | CNC 733  |
| <i>A. cajennense s. l.*</i> | 1   |  | <i>T. tetradactyla</i> | Brasilândia        | Mato Grosso do Sul | 21°15'S 52°2'W  | July 2000      | CNC 334  |
| <i>A. cajennense s. l.*</i> | 1   |  | <i>H. sapiens</i>      | São Roque de Minas | Minas Gerais       | 20°14'S 46°21'W | April 2007     | CNC 1024 |
| <i>A. cajennense s. l.*</i> | 1   |  | <i>H. sapiens</i>      | Americana          | São Paulo          | 22°44'S 47°19'W | September 2011 | CNC 2049 |
| <i>A. cajennense s. l.*</i> | 1   |  | <i>H. sapiens</i>      | Atibaia            | São Paulo          | 23°7'S 46°33'W  | September 2000 | CNC 371  |
| <i>A. cajennense s. l.*</i> | 1   |  | <i>H. sapiens</i>      | Campinas           | São Paulo          | 22°54'S 47°3'W  | September 2002 | CNC 748  |
| <i>A. cajennense s. l.*</i> | 1   |  | <i>Tyto alba</i>       | Guarulhos          | São Paulo          | 23°27'S 46°31'W | August 2003    | CNC 797  |
| <i>A. cajennense s. l.*</i> | 1   |  | <i>C. familiaris</i>   | Indaiatuba         | São Paulo          | 23°5'S 47°13'W  | August 2000    | CNC 369  |
| <i>A. cajennense s. l.*</i> | 2   |  | <i>Capra hircus</i>    | São Paulo          | São Paulo          | 23°32'S 46°38'W | June 2002      | CNC 715  |
| <i>A. cajennense s. l.*</i> | 1   |  | <i>H. sapiens</i>      | São Paulo          | São Paulo          | 23°32'S 46°38'W | July 2000      | CNC 372  |
| <i>A. cajennense s. l.*</i> | 1   |  | <i>D. azarae</i>       | Teodoro Sampaio    | São Paulo          | 22°31'S 52°10'W | August 2009    | CNC 1443 |
| <i>A. cajennense s. l.*</i> | 1   |  | <i>H. sapiens</i>      | Teodoro Sampaio    | São Paulo          | 22°31'S 52°10'W | December 2000  | CNC 611  |
| <i>A. cajennense s. l.*</i> | 2   |  | free living            | Teodoro Sampaio    | São Paulo          | 22°31'S 52°10'W | July 2006      | CNC 1201 |
| <i>A. cajennense s. l.*</i> | 48  |  | free living            | Teodoro Sampaio    | São Paulo          | 22°31'S 52°10'W | August 2005    | CNC 1216 |
| <i>A. cajennense s. l.*</i> | 200 |  | free living            | Teodoro Sampaio    | São Paulo          | 22°31'S 52°10'W | August 2005    | CNC 1218 |
| <i>A. cajennense s. l.*</i> | 222 |  | free living            | Teodoro Sampaio    | São Paulo          | 22°31'S 52°10'W | August 2005    | CNC 1219 |
| <i>A. cajennense s. l.*</i> | 93  |  | free living            | Teodoro Sampaio    | São Paulo          | 22°31'S 52°10'W | October 2005   | CNC 1223 |
| <i>A. cajennense s. l.*</i> | 124 |  | free living            | Teodoro Sampaio    | São Paulo          | 22°31'S 52°10'W | October 2005   | CNC 1225 |
| <i>A. cajennense s. l.*</i> | 83  |  | free living            | Teodoro Sampaio    | São Paulo          | 22°31'S 52°10'W | October 2005   | CNC 1227 |
| <i>A. cajennense s. l.*</i> | 150 |  | free living            | Teodoro Sampaio    | São Paulo          | 22°31'S 52°10'W | July 2005      | CNC 1233 |
| <i>A. cajennense s. l.*</i> | 136 |  | free living            | Teodoro Sampaio    | São Paulo          | 22°31'S 52°10'W | July 2005      | CNC 1234 |
| <i>A. cajennense s. l.*</i> | 1   |  | free living            | Teodoro Sampaio    | São Paulo          | 22°31'S 52°10'W | June 2005      | CNC 1240 |
| <i>A. cajennense s. l.*</i> | 5   |  | free living            | Teodoro Sampaio    | São Paulo          | 22°31'S 52°10'W | January 2006   | CNC 1241 |
| <i>A. cajennense s. l.*</i> | 1   |  | <i>P. cancrivorus</i>  | Jundiá             | São Paulo          | 23°11'S 46°53'W | October 1998   | CNC 169  |

\*\* Technically, all males were morphologically identified as *Amblyomma cajennense s.l.* However, by convenience only in this Table, males from lots containing females were assigned to the same species of the accompanying females. If a lot contained only male(s), it was assigned as *A. cajennense s.l.*

\* TICKS COLLECTED AS NYMPHS

+ TICKS COLLECTED AS LARVAE
